# Supplementary material for: Plant community stability is associated with a decoupling of prokaryote and fungal soil networks
Source: bioRxiv or medRxiv preprint supplement (doi:10.1101/2022.06.21.496867), 2023-05-05
Supplement: Supplementary file [file media-1.pdf]

## 1 **Supplementary methods**

### 2 *Seed collection and sowing*

3 Seeds of most of the plant species were collected from the natural grassland field site and a further  
4 5% were obtained from nearby seed production fields (Planta Naturalis, Markvartice, Czech Republic).  
5 Seeds of all plant species were sown simultaneously. For this, seeds were placed on the soil surface  
6 and gently pressed into the soil to avoid seeds from blowing away (Münzbergová, 2012).

### 8 *Soil chemical analyses*

9 All soil was sieved on a 2 mm mesh and thoroughly mixed. Plant available nitrogen (N) ( $\text{mg kg}^{-1}$  dry soil)  
10 was determined by adding 50 mL of 0.5 M  $\text{K}_2\text{SO}_4$  to 5 g of fresh soil, shaking for 30 min and filtering  
11 the soil out.  $\text{NO}_3^-$ ,  $\text{NH}_4^+$  and  $\text{NO}_2^-$  concentrations in the filtrate were determined by Flow Injection  
12 Analysis (QuickChem 8000 FIA; Lachat Instruments, Loveland, CO, USA). Plant available P was  
13 determined following Olsen et al (1954). In brief, 5 g air dried soil was extracted with 50 mL of 1 M  
14  $\text{NaHCO}_3$  adjusted to pH 8.5 with addition of activated carbon to eliminate discoloration resulting from  
15 humic acid release. The solution was shaken for 2 h and soil was filtered out. Available P in the filtrate  
16 was determined by the Olsen photometric method (ATI Unicam UV 400/VIS Spectrophotometer at  
17 630 nm) (Olsen et al., 1954). K was determined in 5 g air dried soil by shaking with 50 mL Mehlich II  
18 soil extraction solution (Hach Lange GmbH, Düsseldorf, Germany) for 30 min. Soil was filtered out and  
19 and Mg, Ca, and K were measured in the filtrate using atomic absorption spectrometry (ContrAA 700  
20 with  $\text{C}_2\text{H}_2$ -air flame for Mg and K, and  $\text{C}_2\text{H}_2$ - $\text{N}_2\text{O}$  for Ca; Analytik Jena GmbH, Jena, Germany).  
21 Exchangeable pH was measured in a solution of 5 mL in 25 mL 0.1M KCl shaken for 30 min (WTW  
22 Multilab 540; Xylem Analytics, Weilheim, Germany). Total N, C and organic C were determined in dried  
23 soil ground to  $<0.1$  mm particle size using combustion analyses (FLASH 2000 CHNS/O Analyzer; Thermo  
24 Fisher Scientific, Waltham, MA, USA).

### 26 *Soil bacterial and fungal biomass*

27 Soil bacterial and fungal biomass was determined using PLFA and NLFA analysis following García-  
28 Sánchez et al (2019). In short, 1 g of fresh soil taken from the mixed soil cores was freeze-dried in a  
29 chloroform-methanol-phosphate buffer (1:2:0.8, v/v/v) (Bligh, E.G. and Dyer, 1959). Lipids were  
30 fractionated into polar lipids (PLFAs), glycolipids and neutral lipids (NLFAs), using an extraction cartridge  
31 (LiChrolut Si-60; Merck KGaA, Darmstadt, Germany) and subjected to alkaline methanolysis (Šnajdr et  
32 al., 2008). Following Sampedro et al (2009), free methyl esters of PLFAs and NLFAs were analysed by  
33 gas chromatography-mass spectrometry (450-GC with 240-MS IT Mass Spectrometer; Varian Medical  
34 Systems Inc., Palo Alto, CA, USA). Total microbial biomass was estimated by the sum of all PLFA

35 contents. Bacterial biomass was based on the summed PLFA contents i14:0, i15:0, a15:0, 16:1w5,  
36 16:1w7; 16:1w9, 10Me-16:0, i16:0, i17:0, a17:0, cy17:0, 17:0, 10Me-17:0, 18:1w7, 10Me-18:0 and  
37 cy19:0, and actinobacterial biomass based on the summed contents 10Me-16:0, 10Me-17:0 and 10-  
38 Me18:0. Gram-positive and gram-negative bacterial were quantified based on i14:0, i15:0, a15:0,  
39 i16:0, i17:0, a17:0 and 16:1w7, 16:1w9, 18:1w7, cy17:0, cy19:0, respectively. Fungal biomass was  
40 quantified based on PLFA content 18:2w6,9 (Šnajdr et al., 2008) and NLFA 16:1w5 was used as a  
41 marker for AM fungi (Olsson et al., 2003).

42

#### 43 *16S and ITS amplicon sequencing*

44 All frozen soil samples (250 mg each, in duplicates for each sample) were homogenized and lysed in  
45 PowerBead Pro Tubes (Qiagen, Germany) on a Vortex adapter. Subsequently, DNA was extracted using  
46 the DNeasy PowerSoil Kit (Qiagen, Germany) according to the manufacturer's instructions and eluted  
47 in 50 µl of elution buffer. The fungal internal transcribed spacer of the rDNA (ITS2 rDNA) was amplified  
48 using primers gITS7ngs (Ihrmark et al., 2012) and ITS4 (White et al., 1990). The bacterial 16S rRNA  
49 gene (V4 region) was amplified from the same DNA extracts using primers 515f and 806r (Caporaso et  
50 al., 2011). All primers were tagged with sample-specific barcodes of 10-12 bases. PCR mix was  
51 performed in the total volume of 15 µl and contained 0.07 U Thermo Scientific™ *Taq* DNA Polymerase,  
52 10x PCR Buffer, 2.5 mM MgCl<sub>2</sub>, 20 µg BSA (all Thermo Fisher Scientific, Waltham, Massachusetts, USA),  
53 0.3 mM each dNTP, 0.3 µM of each primer and 1 µl of the DNA extract. Thermocycling conditions were  
54 94 °C for 4 min, 25 cycles of 94 °C for 45 s, 52 °C for 60 s and 72 °C for 35 s, followed by 10 min at 72  
55 °C. Each DNA extract was amplified in duplicate. PCR products were visualized on a 1% agarose gel.  
56 The pooled duplicates were purified through columns with the QIAquick PCR Purification Kit (Qiagen,  
57 Hilden, Germany) according to the manufacturer's protocol and eluted into 20 µl of ddH<sub>2</sub>O. DNA  
58 concentrations of the amplicon pools were quantified using a Qubit 2.0 Fluorometer (Thermo Fisher  
59 Scientific) with High Sensitivity Assay Kit. The purified amplicons were pooled in equimolar ratios. Both  
60 negative PCR controls (with ddH<sub>2</sub>O instead of a template) were processed in the same way as the  
61 experimental samples and included into the sequencing library, together with sixty fungal and sixty  
62 bacterial amplicons. The library was sequenced on an Illumina MiSeq instrument (2 × 250 bp) (SEQme,  
63 Dobříš, Czech Republic).

64

#### 65 *16S and ITS bioinformatics*

66 In total, Illumina paired end sequencing of 120 samples and 2 negative controls yielded 4 261 236 raw  
67 sequences. The data were processed using the pipeline SEED2 ver. 2.1.1b (Větrovský et al., 2018).  
68 First, low-quality sequences were discarded (mean quality score < 30). The reads were demultiplexed

69 (no mismatch allowed in the tag sequences) and tag switches (i.e. reads with non-matching tags) were  
70 discarded.

71 The ITS2 region was extracted from the fungal amplicons using ITSx ver. 1.0.11 (Bengtsson-Palme  
72 et al., 2013) and sequences shorter than 20 bp were excluded. This yielded 982 036 sequences which  
73 were clustered to OTUs using UPARSE implementation in USEARCH ver. 8.1.1861 (Edgar, 2013) with  
74 97% similarity threshold (45 480 chimeric sequences were excluded during this step). The most  
75 abundant sequences were selected for each of the resulting 10 685 OTUs. These sequences were  
76 checked for their identity via BLASTn algorithm against the UNITE database ver. 8.3 (Nilsson et al.,  
77 2019) and non-fungal, no-hit sequences as well as global singletons, doubletons and tripletons were  
78 excluded from further analyses leaving 2638 OTUs represented by 840 206 reads. Two OTUs  
79 represented by six reads detected in the negative control were subtracted from the corresponding  
80 OTUs across the dataset. The ecological guilds of the fungal OTUs were parsed using the database  
81 FungalTraits (Pöhlme et al., 2020) at genus and sequence levels.

82 Primers were cut from prokaryote reads (1 319 594 reads after demultiplexing) and sequences  
83 shorter than 20 bp were excluded. The reads were clustered to OTUs using UPARSE implementation  
84 in USEARCH ver. 8.1.1861 (Edgar, 2013) with 97% similarity threshold (442 826 chimeric sequences  
85 were excluded during this step). OTUs with  $n < 5$  were discarded. The most abundant sequences were  
86 selected for each of the resulting 6532 OTUs. These sequences were checked for their identity via  
87 BLASTn algorithm against the RDP trainset 16 (Cole et al., 2014). 179 reads detected in the negative  
88 control were subtracted from the corresponding OTUs across the dataset. OTUs with non-target and  
89 no BLASTn hits were excluded from further analyses leaving 6369 OTUs represented by 841 512 reads.

90

### 91 *Structural equation models*

92 To keep the number of potential pathways relative low and avoid spurious effects occurring due to  
93 correlating exogeneous variables, we first calculated three base models for each soil type following  
94 (Radujković et al., 2021). These three base models captured effects of the plant community onto soil  
95 chemical changes after the 13th growing season of (a) the plant community in the year of sampling  
96 (aboveground and belowground productivity, plant diversity and plant compositional NMDS axes 1-  
97 3), (b) overall effects of the plant community from the past (initial invasion effect on plant diversity,  
98 aboveground productivity and plant diversity trajectories in time), and (c) plant compositional effects  
99 from the past (invasion effect size on plant compositional NMDS axis 2, plant compositional NMDS  
100 axes 1-3 trajectories in time). All base models included the same soil chemical parameters: total soil  
101 N, C, organic C and pH, and plant available P,  $\text{NO}_3^-$ ,  $\text{NH}_4^+$ ,  $\text{NO}_2^-$ .

102 Since a few of the exogeneous plant community parameters significantly correlated in various  
103 cases between the three base models, we replaced each plant community parameter in each model  
104 with significantly correlating plant community parameters from the other two base models (Fig S11).  
105 In case this replacement improved the AIC of the model, the plant community parameter belonging  
106 to one of the other base models was considered to represent the effects best. Model selection was  
107 then re-run without inclusion of the correlating parameter as these effects were better represented  
108 in one of the other base models. The three base models were then merged for each soil origin and  
109 another round of stepwise selection was run to end up with the most parsimonious model.

110 Secondly, in each SEM, we ran through each bacterial, fungal and microbial biomass parameter  
111 (biomass pools based on PLFA/NLFA analyses and summed relative reads per 16S or ITS cluster from  
112 the calculated co-occurrence networks per soil type) as the final parameter to be estimated. Per run,  
113 one microbial parameter was considered, which could be affected either directly by the plant  
114 community parameters or indirectly via the soil chemical variables. Each run, a backward stepwise  
115 elimination procedure to consecutively remove non-significant pathways was followed in the same  
116 way as performed for the base models (in 't Zandt et al., 2020). All microbial variables not following a  
117 normal distribution were ln- or sqrt-transformed.

118

## 119 *References*

- 120 Bengtsson-Palme, J., Ryberg, M., Hartmann, M., Branco, S., Wang, Z., Godhe, A., de Wit, P., Sánchez-  
121 García, M., Ebersberger, I., de Sousa, F., Amend, A. S., Jumpponen, A., Unterseher, M.,  
122 Kristiansson, E., Abarenkov, K., Bertrand, Y. J. K., Sanli, K., Eriksson, K. M., Vik, U., ... Nilsson, R.  
123 H. (2013). Improved software detection and extraction of ITS1 and ITS2 from ribosomal ITS  
124 sequences of fungi and other eukaryotes for analysis of environmental sequencing data.  
125 *Methods in Ecology and Evolution*, 4(10), 914–919. <https://doi.org/10.1111/2041-210X.12073>
- 126 Bligh, E.G. and Dyer, W. J. (1959). A rapid method of total lipid extraction and purification. *Canadian*  
127 *Journal of Biochemistry and Physiology*, 37(8).
- 128 Caporaso, J. G., Lauber, C. L., Walters, W. A., Berg-Lyons, D., Lozupone, C. A., Turnbaugh, P. J., Fierer,  
129 N., & Knight, R. (2011). Global patterns of 16S rRNA diversity at a depth of millions of  
130 sequences per sample. *Proceedings of the National Academy of Sciences*, 108(supplement\_1),  
131 4516–4522. <https://doi.org/10.1073/pnas.1000080107>
- 132 Cole, J. R., Wang, Q., Fish, J. A., Chai, B., McGarrell, D. M., Sun, Y., Brown, C. T., Porras-Alfaro, A.,  
133 Kuske, C. R., & Tiedje, J. M. (2014). Ribosomal Database Project: data and tools for high  
134 throughput rRNA analysis. *Nucleic Acids Research*, 42(D1), D633–D642.  
135 <https://doi.org/10.1093/nar/gkt1244>
- 136 Edgar, R. C. (2013). UPARSE: highly accurate OTU sequences from microbial amplicon reads. *Nature*  
137 *Methods*, 10(10), 996–998. <https://doi.org/10.1038/nmeth.2604>
- 138 García-Sánchez, M., Cajthaml, T., Filipová, A., Tlustoš, P., Száková, J., & García-Romera, I. (2019).  
139 Implications of mycoremediated dry olive residue application and arbuscular mycorrhizal fungi

140 inoculation on the microbial community composition and functionality in a metal-polluted soil.  
141 *Journal of Environmental Management*, 247(July), 756–765.  
142 <https://doi.org/10.1016/j.jenvman.2019.05.101>

143 Ihrmark, K., Bödeker, I. T. M., Cruz-Martinez, K., Friberg, H., Kubartova, A., Schenck, J., Strid, Y.,  
144 Stenlid, J., Brandström-Durling, M., Clemmensen, K. E., & Lindahl, B. D. (2012). New primers to  
145 amplify the fungal ITS2 region - evaluation by 454-sequencing of artificial and natural  
146 communities. *FEMS Microbiology Ecology*, 82(3), 666–677. <https://doi.org/10.1111/j.1574-6941.2012.01437.x>

148 in 't Zandt, D., Hoekstra, N. J., Wagemaker, C. A. M., Caluwe, H., Smit-Tiekstra, A. E., Visser, E. J. W.,  
149 & Kroon, H. (2020). Local soil legacy effects in a multispecies grassland community are  
150 underlain by root foraging and soil nutrient availability. *Journal of Ecology*, 108(6), 2243–2255.  
151 <https://doi.org/10.1111/1365-2745.13449>

152 Münzbergová, Z. (2012). Seed density significantly affects species richness and composition in  
153 experimental plant communities. *PLoS ONE*, 7(10).  
154 <https://doi.org/10.1371/journal.pone.0046704>

155 Nilsson, R. H., Larsson, K. H., Taylor, A. F. S., Bengtsson-Palme, J., Jeppesen, T. S., Schigel, D.,  
156 Kennedy, P., Picard, K., Glöckner, F. O., Tedersoo, L., Saar, I., Kõljalg, U., & Abarenkov, K. (2019).  
157 The UNITE database for molecular identification of fungi: Handling dark taxa and parallel  
158 taxonomic classifications. *Nucleic Acids Research*, 47(D1), D259–D264.  
159 <https://doi.org/10.1093/nar/gky1022>

160 Olsen, S., Cole, C., Watanabe, F., & Dean, L. (1954). Estimation of available phosphorus in soils by  
161 extraction with sodium bicarbonate. In *USDA Circular Nr 939*. US Gov. Print. Office.

162 Olsson, P. A., Larsson, L., Bago, B., Wallander, H., & van Aarle, I. M. (2003). Ergosterol and fatty acids  
163 for biomass estimation of mycorrhizal fungi. *New Phytologist*, 159, 1–10.

164 Pöhlme, S., Abarenkov, K., Henrik Nilsson, R., Lindahl, B. D., Clemmensen, K. E., Kauserud, H., Nguyen,  
165 N., Kjøller, R., Bates, S. T., Baldrian, P., Frøslev, T. G., Adojaan, K., Vizzini, A., Suija, A., Pfister, D.,  
166 Baral, H. O., Järv, H., Madrid, H., Nordén, J., ... Tedersoo, L. (2020). FungalTraits: a user-friendly  
167 traits database of fungi and fungus-like stramenopiles. *Fungal Diversity*, 105(1).  
168 <https://doi.org/10.1007/s13225-020-00466-2>

169 Radujković, D., Verbruggen, E., Seabloom, E. W., Bahn, M., Biederman, L. A., Borer, E. T., Boughton,  
170 E. H., Catford, J. A., Campioli, M., Donohue, I., Ebeling, A., Eskelinen, A., Fay, P. A., Hansart, A.,  
171 Knops, J. M. H., MacDougall, A. S., Ohlert, T., Olde Venterink, H., Raynaud, X., ... Vicca, S. (2021).  
172 Soil properties as key predictors of global grassland production: Have we overlooked  
173 micronutrients? *Ecology Letters*, 24(12), 2713–2725. <https://doi.org/10.1111/ele.13894>

174 Sampedro, I., Giubilei, M., Cajthaml, T., Federici, E., Federici, F., Petruccioli, M., & D'annibale, A.  
175 (2009). Short-term impact of dry olive mill residue addition to soil on the resident microbiota.  
176 *Bioresource Technology*, 100(23), 6098–6106. <https://doi.org/10.1016/j.biortech.2009.06.026>

177 Šnajdr, J., Valášková, V., Merhautová, V., Cajthaml, T., & Baldrian, P. (2008). Activity and spatial  
178 distribution of lignocellulose-degrading enzymes during forest soil colonization by saprotrophic  
179 basidiomycetes. *Enzyme and Microbial Technology*, 43(2), 186–192.  
180 <https://doi.org/10.1016/j.enzmictec.2007.11.008>

181 Větrovský, T., Baldrian, P., & Morais, D. (2018). SEED 2: A user-friendly platform for amplicon high-  
182 throughput sequencing data analyses. *Bioinformatics*, 34(13), 2292–2294.  
183 <https://doi.org/10.1093/bioinformatics/bty071>

184 White, T., Bruns, T., Lee, S., & Taylor, J. (1990). Amplification and direct sequencing of fungal  
185 ribosomal RNA genes for phylogenetics. In T. White (Ed.), *PCR protocols, a guide to methods*  
186 *and applications* (pp. 315–322). Academic Press.

187

188

## Supplementary figures

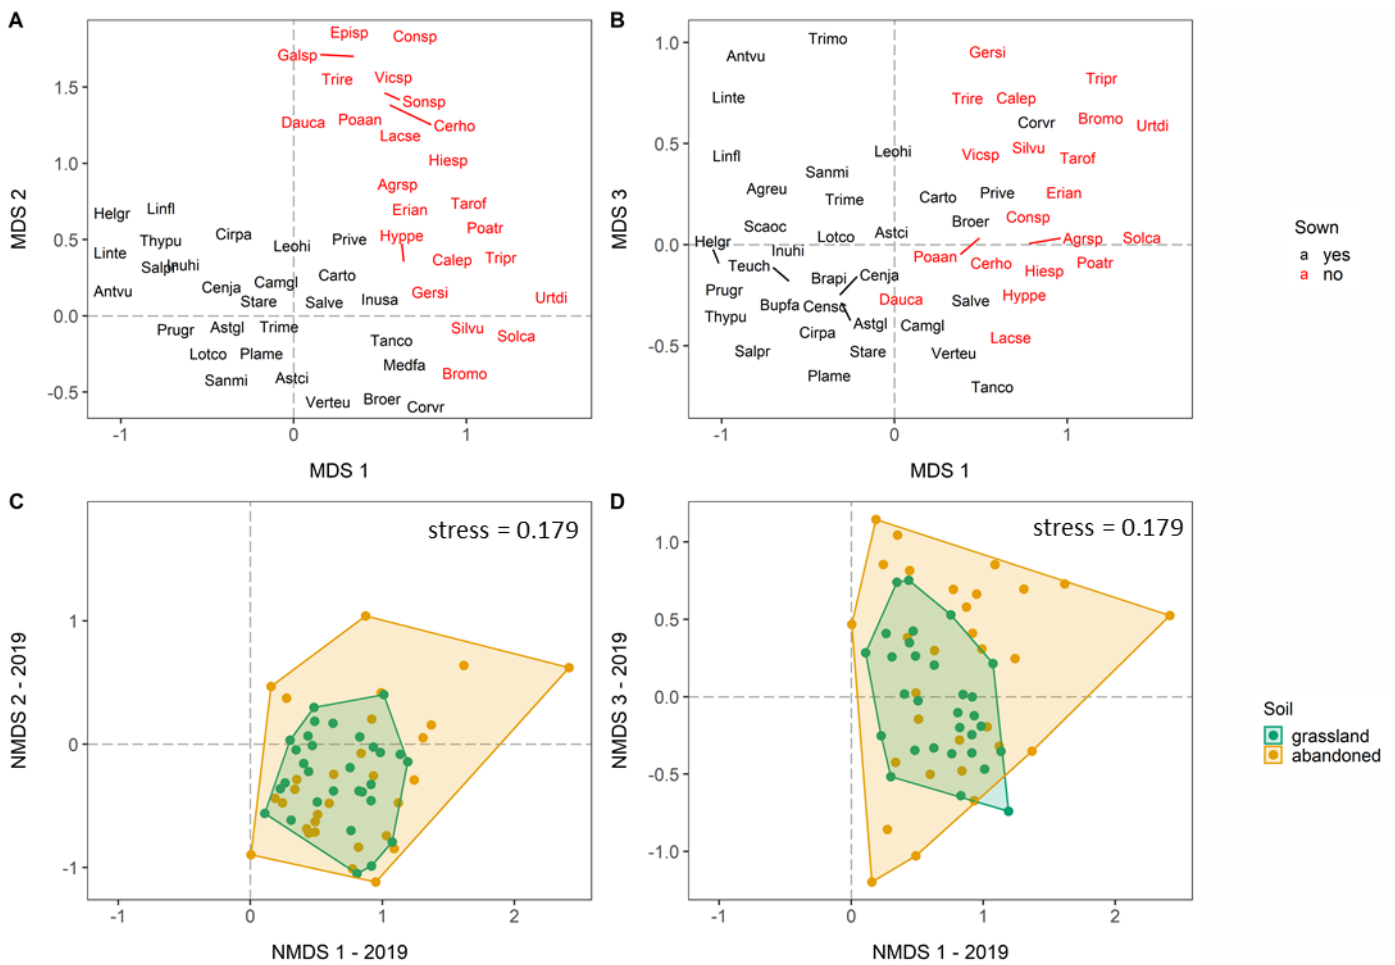

**Figure S1** Plant species position on the non-metric multidimensional scaling (NMDS) axes (A) 1 and 2, and (B) 1 and 3 ( $n = 59$  plant species). Plant community positions in 2019 on the NMDS axes (C) 1 and 2, and (D) 1 and 3 on natural grassland (green) and abandoned arable soil (yellow) ( $n = 30$  communities on each soil). For NMDS patterns over time, see Fig 1. For plant species abbreviations, see Table S9.

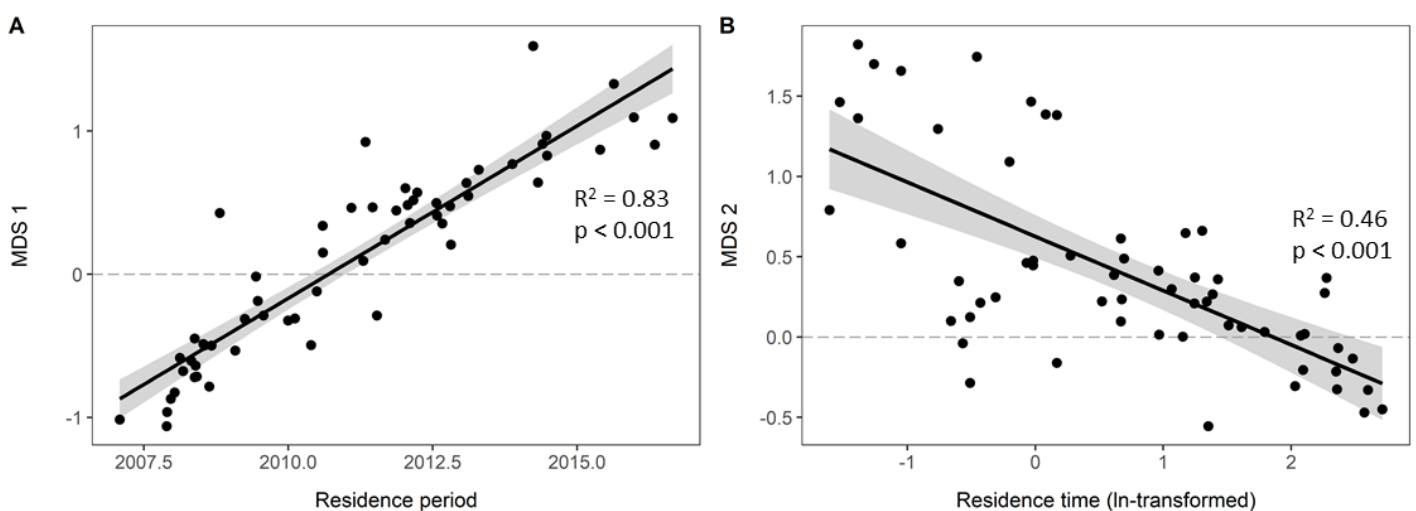

**Figure S2** Scores of plant species resulting from non-metric multidimensional scaling (NMDS). (A) MDS score 1 correlated to the average residence period (in calendar years) of the plant species (present in early or later years of the experiment; 2007 to 2019) and (B) MDS score 2 correlated to the average residence time (in years, ln-transformed) of the plant species (present for 1 to 13 years) ( $n = 59$  species, rare species excluded).

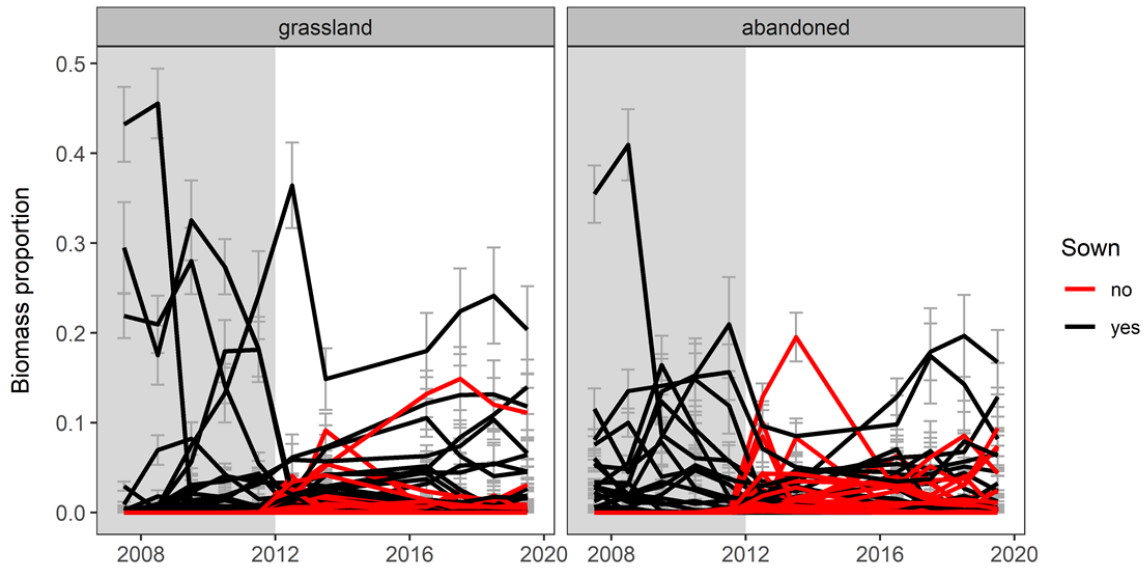

**Figure S3** Biomass proportion of sown plant species (black) and invaded plant species (red) over time in plant communities established on natural grassland and abandoned arable soil. Grey shading indicates the period where no invasion was allowed to occur. Averages  $\pm$  SE;  $n = 59$  plant species per soil, rare species excluded.

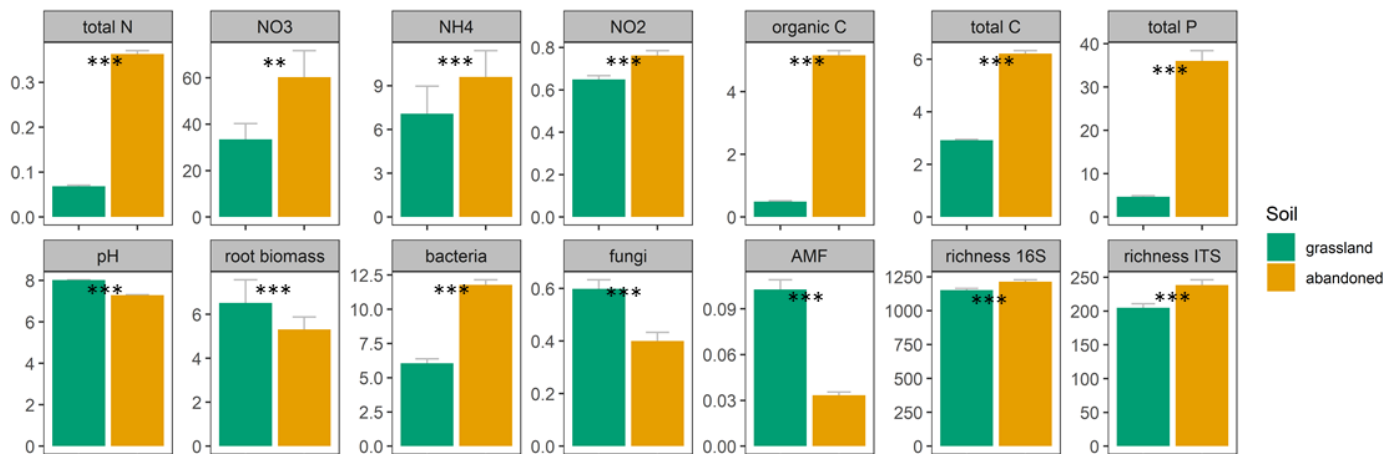

**Figure S4** Soil chemical and microbial properties after the 13th growing season in communities grown on natural grassland (green) and abandoned arable (yellow). Total N, C and organic C are given in percentage; NO<sub>3</sub>, NH<sub>4</sub>, NO<sub>2</sub>, K and P, as well as bacterial, fungal and AMF biomass are given in mg · kg<sup>-1</sup> dry soil. Root biomass is given in g. 16S and ITS richness represent the number of unique OTUs. Averages  $\pm$  SE ( $n = 30$ ), asterisks indicate significant differences between natural grassland and abandoned arable soil (tested in a linear mixed effects model with seed density as random effect). Significance codes: \*\*\*  $p < 0.001$ ; \*\*  $p < 0.01$ .



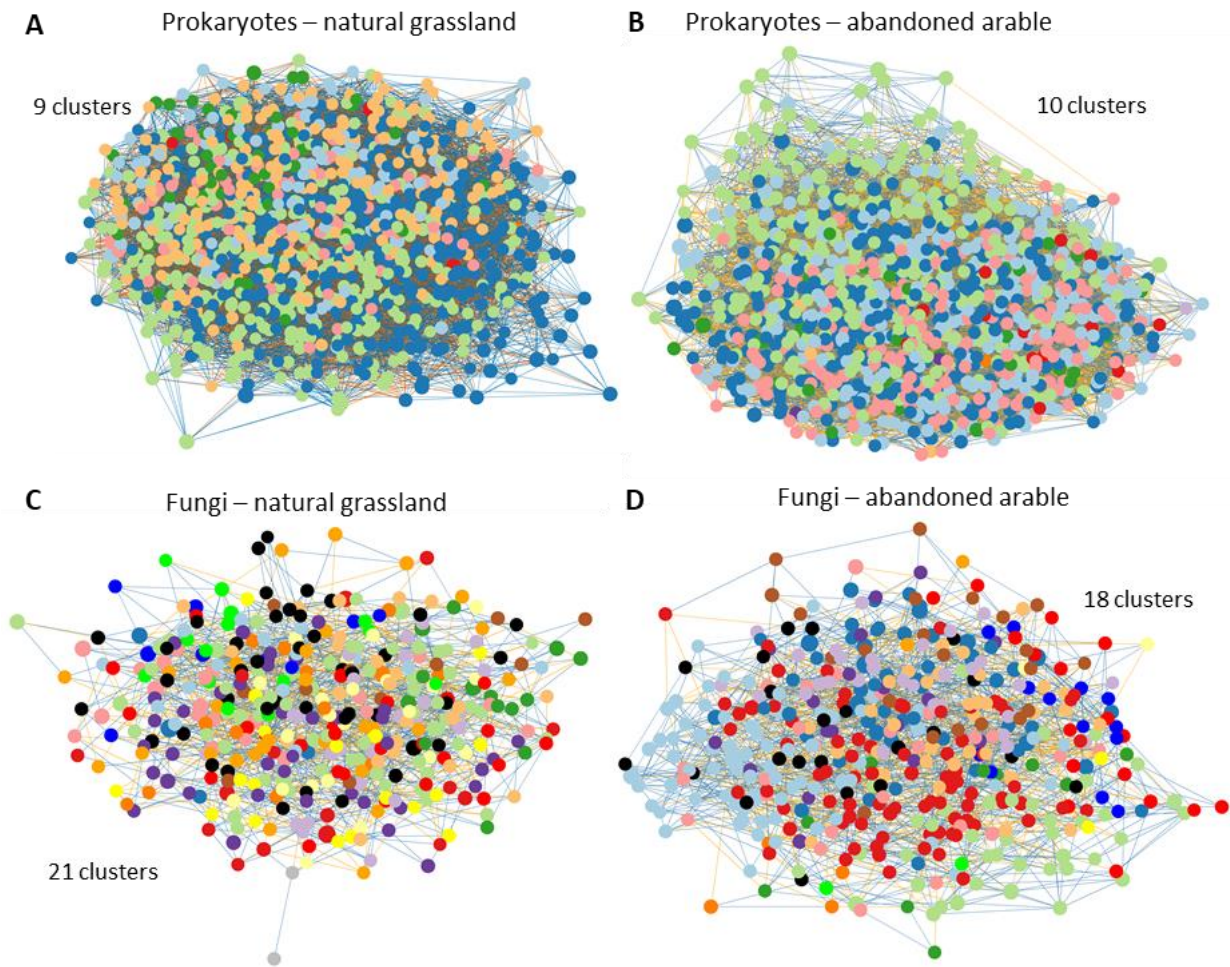

**Figure S5** Soil microbial co-occurrence networks of prokaryotes in (A) natural grassland soil and (B) in abandoned arable soil, and of fungi in (C) natural grassland soil and (D) abandoned arable soil. Each dot represents one OTU. Different colours indicate that OTUs belonged to different co-occurrence clusters within the network ( $n = 30$  communities).

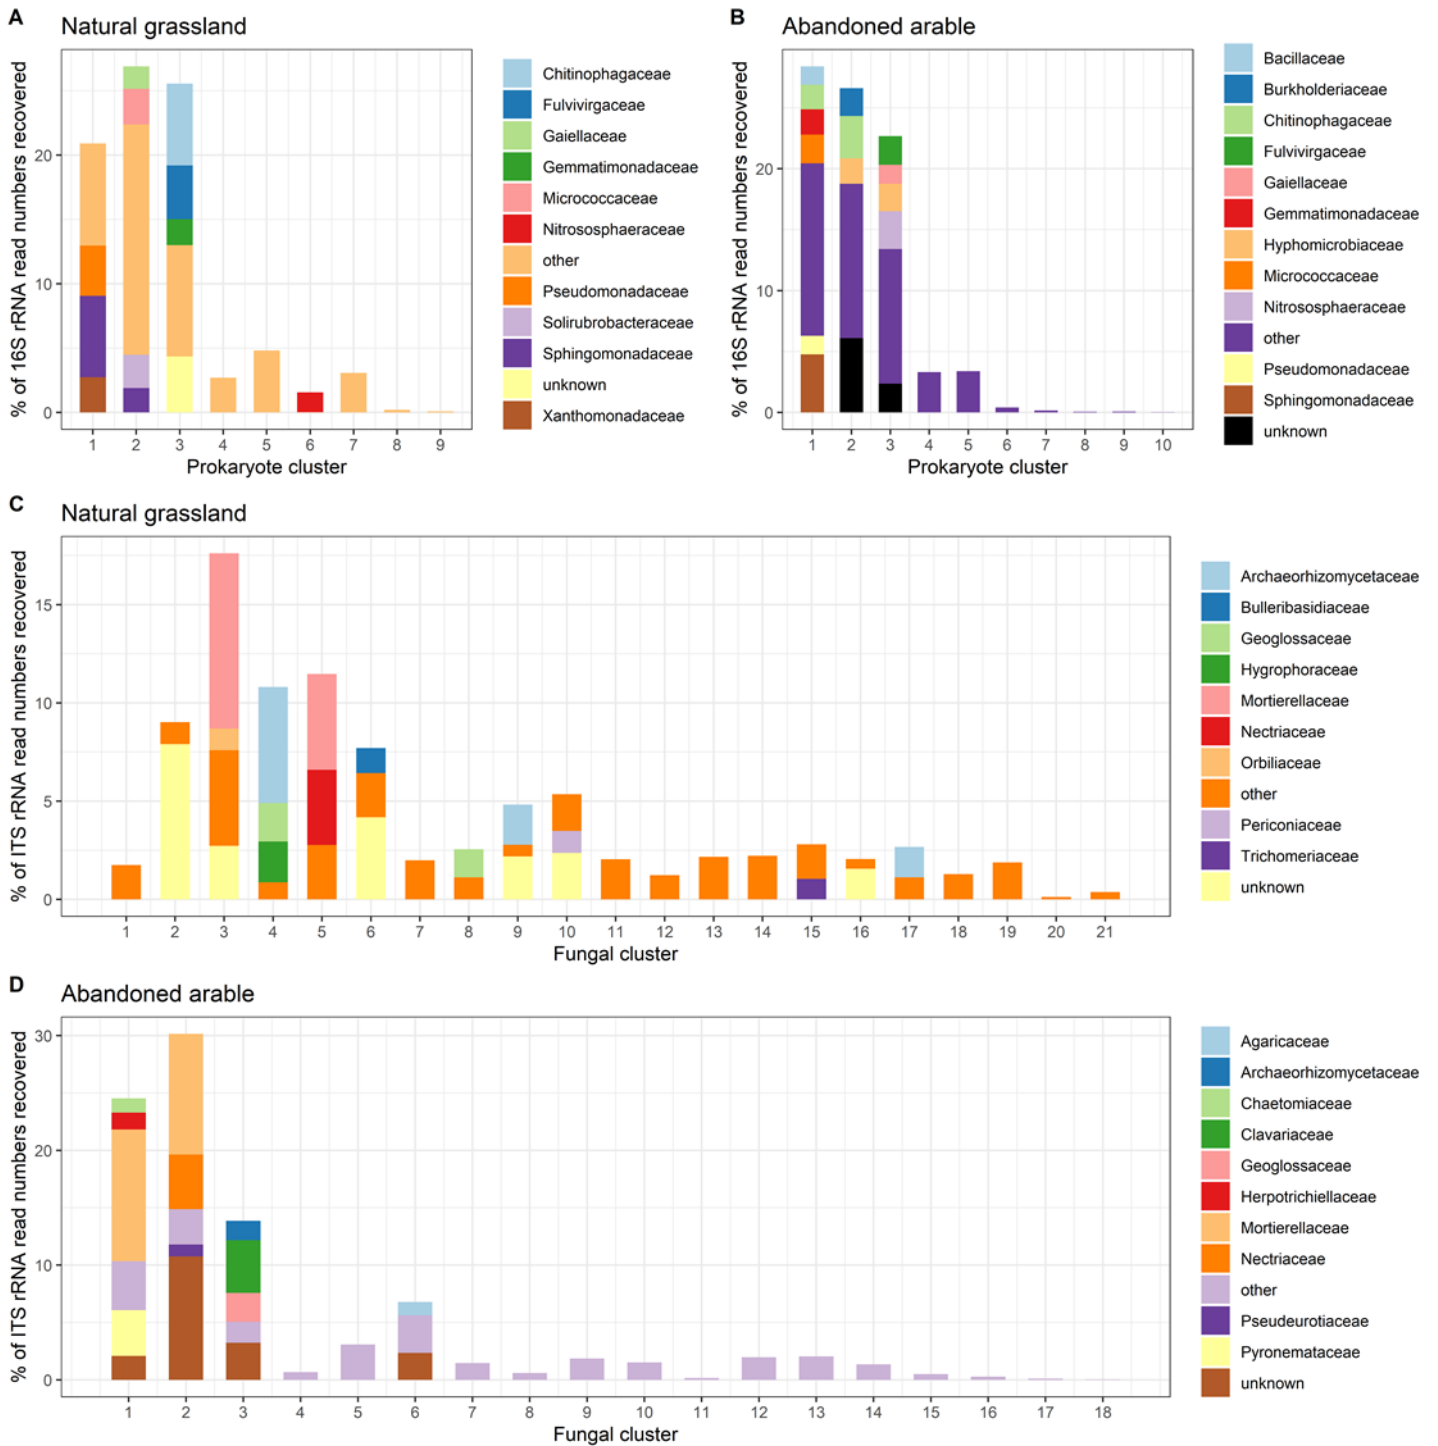

**Figure S6** Average percentage of 16S and ITS rRNA read numbers recovered per family level over similarly responding prokaryote in (A) natural grassland and (B) abandoned arable soil, and fungal clusters in (C) natural grassland and (D) abandoned arable soil obtained from co-occurrence networks. For 16S, families < 1.5% relative abundances are grouped in 'other', for ITS, families < 1% relative abundances are grouped in 'other'.

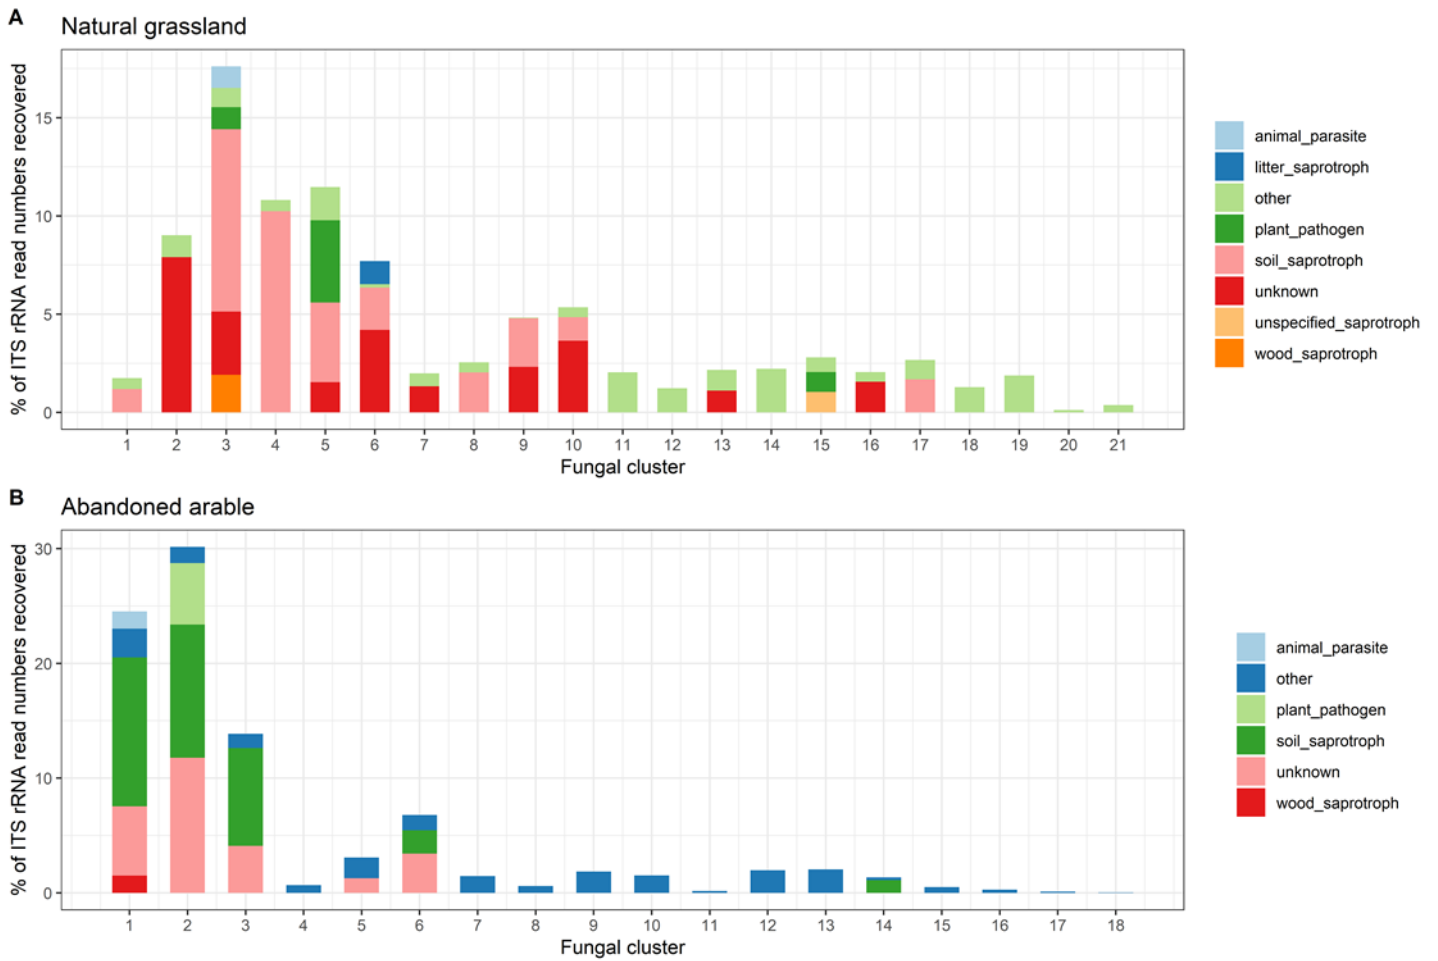

**Figure S7** Average percentage of ITS rRNA read numbers recovered per putative fungal trait over similarly responding fungal clusters obtained from co-occurrence networks in (A) natural grassland and (B) abandoned arable soil. Putative fungal traits < 1% relative abundances are grouped in 'other'.

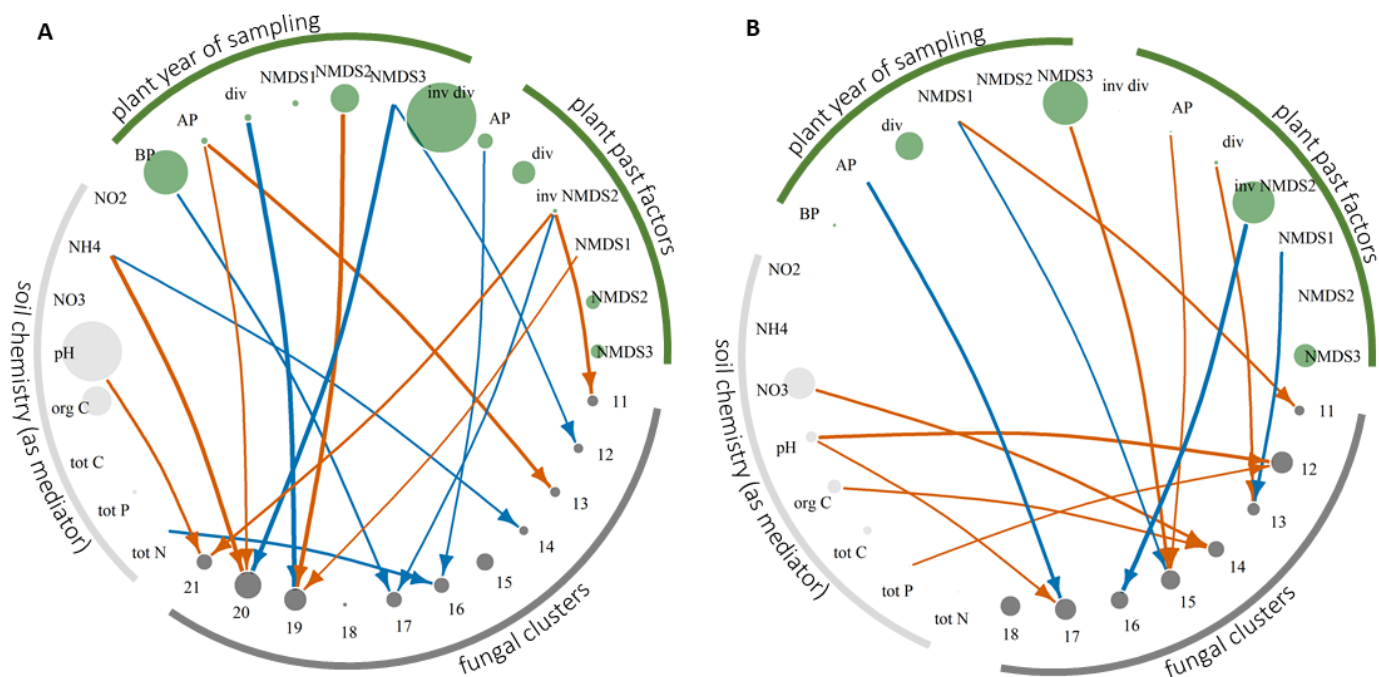

**Figure S8** continued from Fig 5 representing fungal clusters 11 and beyond. Significant pathways obtained from structural equation models testing effects of plant community parameters in the year of sampling (2019) and the past (2007-2019) on soil fungal networks in (A) natural grassland soil and (B) abandoned arable soil. Direct effects were separated from *indirect* effects that occurred via changes in soil chemical properties. Plant vertices are indicated in green, soil chemical vertices in light grey and microbial vertices in dark grey. Plant vertex sizes indicate the summed direct and indirect pathway effect sizes onto microbial parameters. Soil chemical vertices indicate only the summed *indirect* pathway effect sizes. Microbial vertices indicate the summed direct and *indirect* pathway effect sizes that these microbial parameters were affected by. All summed pathway effect sizes were scaled to the size of the microbial parameters involved. Negative pathways are represented in vermilion, positive in blue. Arrows indicate the direction of the pathways and the width of the arrows its effect size. Soil chemical pathways are only included when the plant community affected the soil chemical variable. For plant-soil chemical pathways, see Fig S9. Plant year of sampling factors: BP – belowground productivity, AP – aboveground productivity, div – plant diversity, NMDS1 – plant composition related to species residence period, NMDS2 – plant composition related to species residence time, NMDS3 – plant composition related to species differential dominance. Plant past factors: inv div – initial invasion effect size on plant diversity (increase in diversity between 2011 and 2013), AP – aboveground productivity trajectory, div – plant diversity trajectory, inv NMDS2 – initial invasion effect size on plant composition NMDS2 (increase in new individuals between 2011 and 2012), NMDS1-3 – plant compositional trajectories (see Fig 4A, S1-S2 for more details). Only significant pathways are included ( $p < 0.05$ ;  $n = 30$ ).

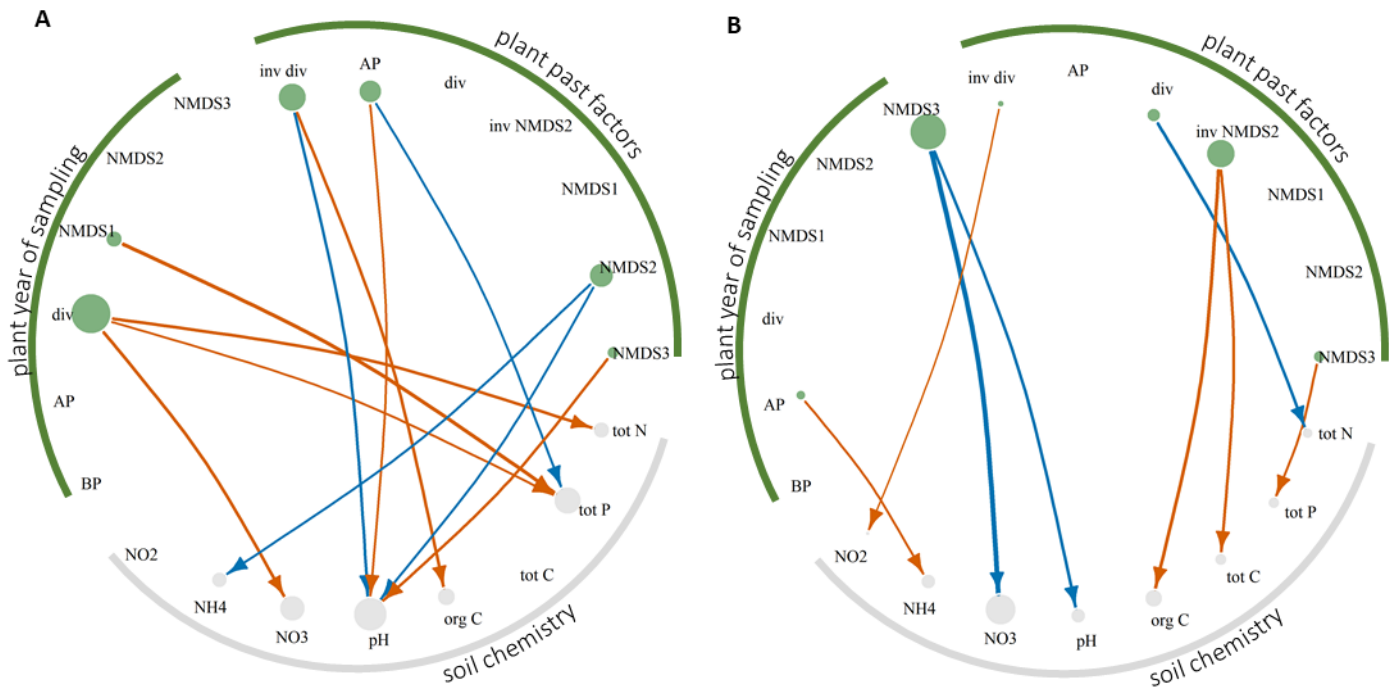

**Figure S9** Significant pathways obtained from structural equation models showing effects of plant community parameters in the year of sampling (2019) and the past (2007-2019) on soil chemical properties in (A) natural grassland soil and (B) abandoned arable soil. Plant vertices are indicated in green and soil chemical vertices in grey. Plant vertex sizes indicate the summed pathway effect sizes of the parameter onto all soil chemical properties. Soil chemical vertex sizes indicate the summed pathway effect sizes of all plant community parameters the chemical parameter was affected by. Negative pathways are represented in vermilion, positive in blue. Arrows indicate the direction of the pathways and the width of the arrows its effect size.

Plant year of sampling factors: BP – belowground productivity, AP – aboveground productivity, div – plant diversity, NMDS1 – plant composition related to species residence period, NMDS2 – plant composition related to species residence time, NMDS3 – plant composition related to species differential dominance. Plant past factors: inv div – initial invasion effect size on plant diversity (increase in diversity between 2011 and 2013), AP – aboveground productivity trajectory, div – plant diversity trajectory, inv NMDS2 – initial invasion effect size on plant composition NMDS2 (increase in new individuals between 2011 and 2012), NMDS1-3 – plant compositional trajectories (see Fig 4A, S1-S2 for more details). Only significant pathways are included ( $p < 0.05$ ;  $n = 30$ ).

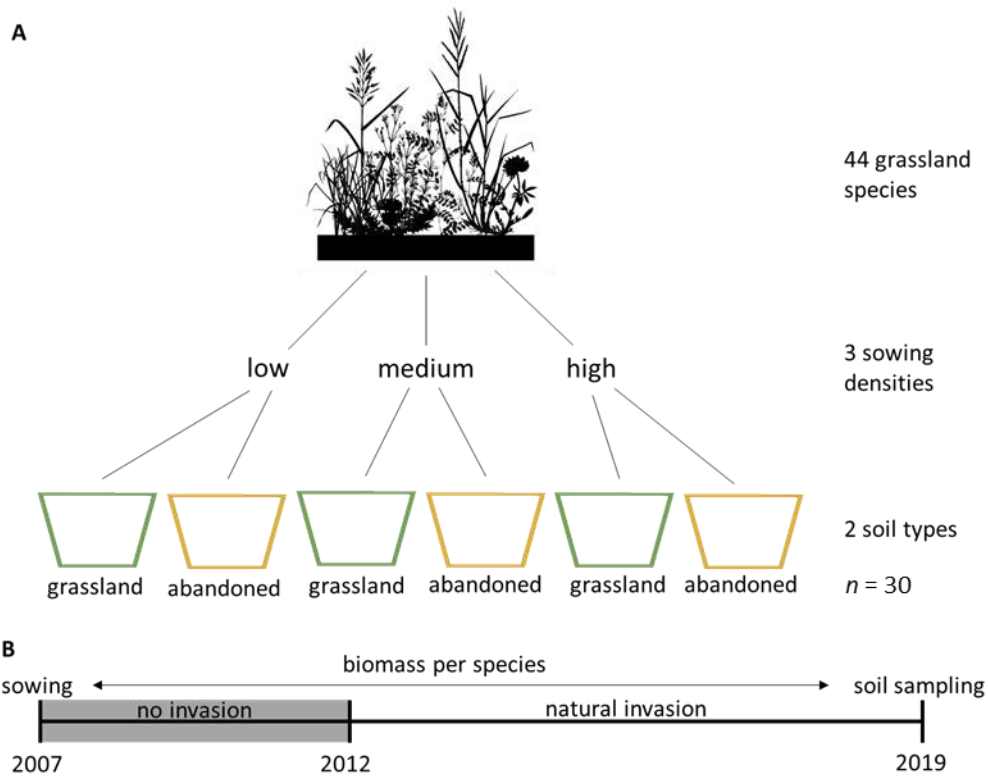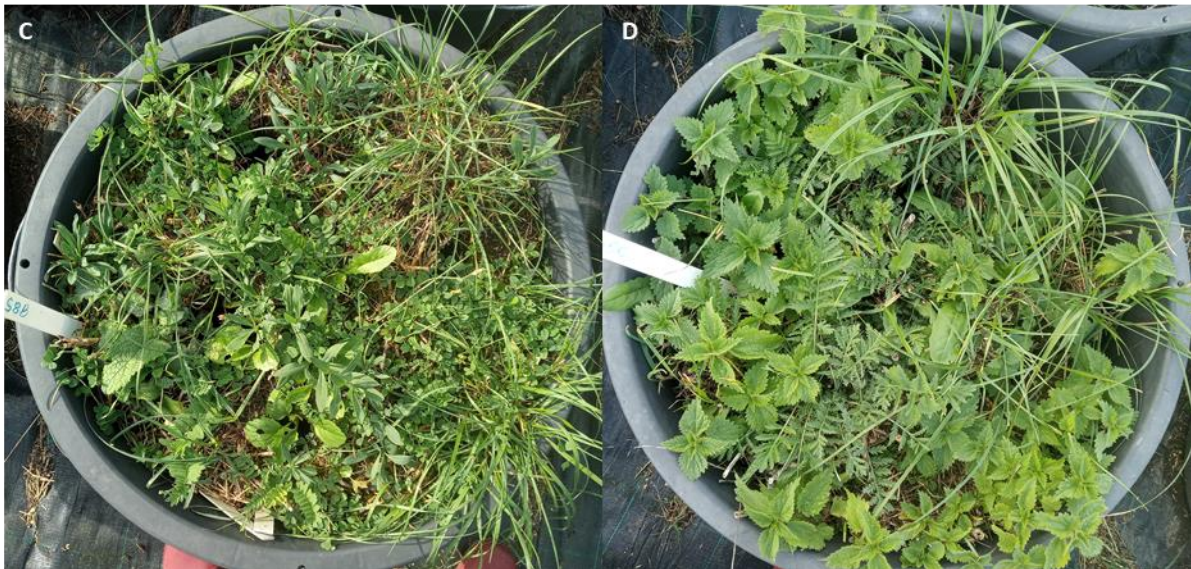

**Figure S10** (A) Experimental design, (B) timeline of the experiment and two typical images of a (C) natural grassland and (D) abandoned arable plant communities (summer 2020). In A, sowing densities represent 25% (low), 100% (medium) and 400% (high) of the natural seed densities as determined in a natural grassland community where the 44 plant species naturally coexist. Grassland soil was taken from a natural grassland and abandoned soil from an arable field that was abandoned in the 1950s (see also Münzbergová, 2012). In B, plant communities were sown in 2007 followed by a 5 year period in which invasion of other plant species was avoided. From 2012 to 2019, natural invasion occurred. In 2019 after the growing season, soil cores for chemical and microbial analysis were taken. For sown and invaded plant species, see Table S9.

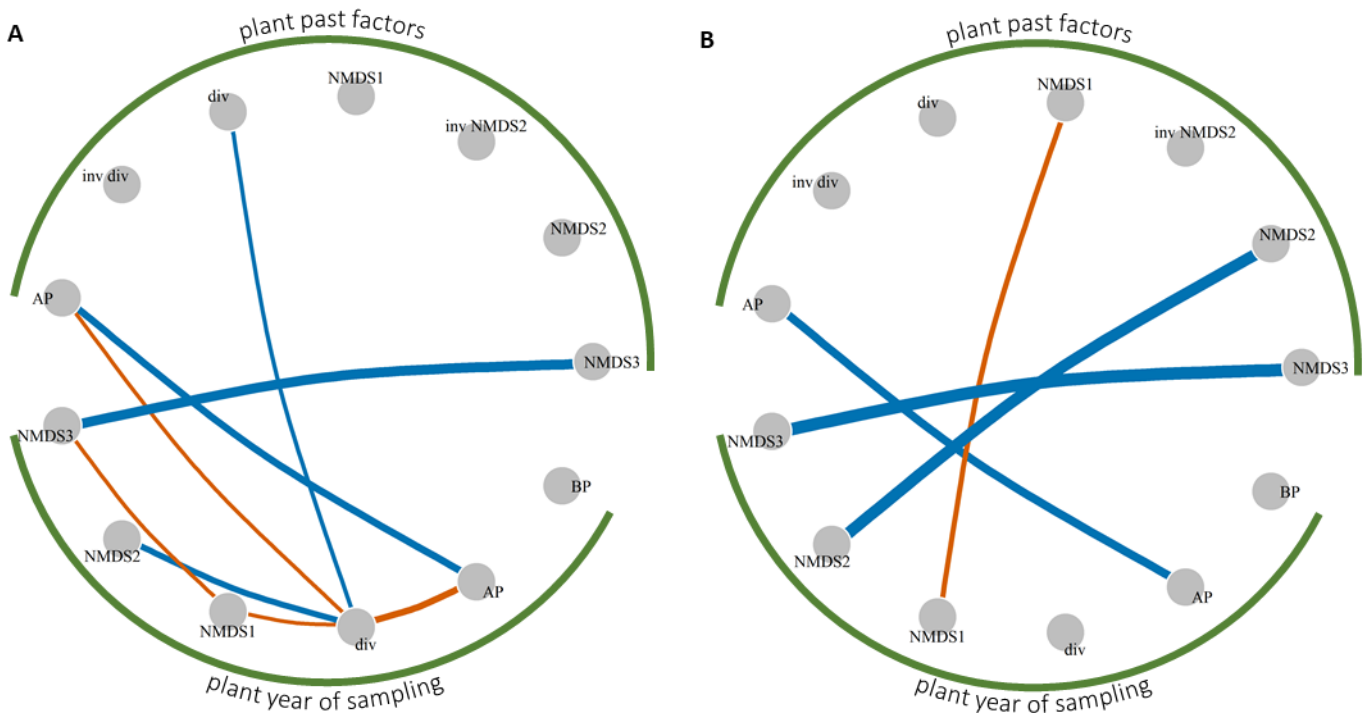

**Figure S11** Correlations between aboveground plant community parameters in (A) natural grassland and (B) abandoned arable soil. Blue lines indicate significant ( $p < 0.05$ ) positive correlations, vermilion significant negative correlations. The width of the line indicate the correlation strength ( $n = 30$ ). Plant year of sampling factors: BP – belowground productivity, AP – aboveground productivity, div – plant diversity, NMDS1 – plant composition related to species residence period, NMDS2 – plant composition related to species residence time, NMDS3 – plant composition related to species differential dominance. Plant past factors: inv div – initial invasion effect size on plant diversity (increase in diversity between 2011 and 2013), AP – aboveground productivity trajectory, div – plant diversity trajectory, inv NMDS2 – initial invasion effect size on plant composition NMDS2 (increase in new individuals between 2011 and 2012), NMDS1-3 – plant compositional trajectories.

## Supplementary tables

**Table S1** Microbial co-occurrence network parameters typically associated with network stability for networks based on 16S and ITS amplicon sequencing

|                                  | Prokaryote network |                  | Fungal network    |                  |
|----------------------------------|--------------------|------------------|-------------------|------------------|
|                                  | Natural grassland  | Abandoned arable | Natural grassland | Abandoned arable |
| Number of nodes                  | 1008               | 1024             | 403               | 455              |
| Number of edges                  | 10209              | 10079            | 1470              | 1874             |
| Average number of edges per node | 20.3               | 19.7             | 7.3               | 8.2              |
| Negative edges                   | 46%                | 46%              | 36%               | 33%              |
| Edge betweenness                 | 132                | 139              | 467               | 510              |
| Average edge weight              | 0.07               | 0.07             | 0.08              | 0.08             |
| Number of clusters               | 9                  | 10               | 21                | 18               |
| Clustering coefficient           | 0.36               | 0.35             | 0.54              | 0.56             |



**Table S2** Dominant phyla, orders and families in soil prokaryote clusters of plant communities grown on natural grassland soil

| Cluster          | Dominant phyla (>20%)                                          | Dominant orders (>9%)                                                                               | Dominant families (>9%)                                                                                | Relates to                                                                                 | Putative metabolic traits and functions                                                    |
|------------------|----------------------------------------------------------------|-----------------------------------------------------------------------------------------------------|--------------------------------------------------------------------------------------------------------|--------------------------------------------------------------------------------------------|--------------------------------------------------------------------------------------------|
| <b>1 (large)</b> | <i>Proteobacteria</i> (77.6%)                                  | <i>Sphingomonadales</i> (30.4%)<br><i>Pseudomonadales</i> (18.6%)<br><i>Xanthomonadales</i> (13.1%) | <i>Sphingomonadaceae</i> (30.3%)<br><i>Pseudomonadaceae</i> (18.6%)<br><i>Xanthomonadaceae</i> (13.1%) | Belowground productivity (+)                                                               | Generalist, fast growing metabolically diverse chemoheterotrophs                           |
| <b>2 (large)</b> | <i>Actinobacteria</i> (57.7%)<br><i>Proteobacteria</i> (32.6%) | <i>Micrococcales</i> (16.2%)<br><i>Solirubacterales</i> (12.2%)<br><i>Rhizobiales</i> (11.1%)       | <i>Micrococcaceae</i> (10.0%)<br><i>Solirubrobacteraceae</i> (9.6%)                                    | Plant diversity trajectory (-), NMDS2 trajectory (-)                                       | Specialist chemoheterotrophs. Partially likely involved in N-fixation. Many unknown.       |
| <b>3 (large)</b> | <i>Bacteroidetes</i> (44.6%)<br><i>Proteobacteria</i> (26.9%)  | <i>Chitinophagales</i> (24.9%)<br><i>Cytophagales</i> (17.3%)                                       | <i>Chitinophagaceae</i> (24.9%)<br><i>Fulvivirgaceae</i> (16.3%)                                       | Total N (+), plant diversity trajectory (+), NMDS2 trajectory (+)                          | Specialist, fast growing chemoheterotrophs                                                 |
| <b>4 (small)</b> | <i>Proteobacteria</i> (80.6%)                                  | <i>Burkholderiales</i> (38.0%)<br><i>Nitrosomonadales</i> (13.3%)                                   | <i>Burkholderiaceae</i> (33.9%)<br><i>Nitrosomonadaceae</i> (13.3%)                                    | Belowground productivity (-)                                                               | Generalist, slow growing chemoheterotrophs. Partially likely involved in nitrification     |
| <b>5 (small)</b> | <i>Proteobacteria</i> (66.1%)                                  | <i>Rhizobiales</i> (27.6%)<br><i>Nevskiales</i> (21.3%)                                             | <i>Steroidobacteraceae</i> (21.3%)<br><i>Hyphomicrobiaceae</i> (14.7%)                                 | Organic C (+), belowground productivity (-), NMDS1 (+), invasion effect size diversity (+) | Specialist, slow growing chemolithoautotrophs and chemoheterotrophs                        |
| <b>6 (small)</b> | <i>Thaumarchaeota</i> (98.7%)                                  | <i>Nitrososphaerales</i> (98.7%)                                                                    | <i>Nitrososphaeraceae</i> (98.7%)                                                                      | Organic C (+), NMDS1 (+), invasion effect size diversity (+)                               | Specialists. Ammonia oxidising archaea: chemolithoautotrophs, but likely also -heterotroph |
| <b>7 (small)</b> | <i>Proteobacteria</i> (57.3%)                                  | All below 9%                                                                                        | All below 9%                                                                                           | Plant diversity (-)                                                                        | Unclear generalists                                                                        |
| <b>8 (small)</b> | <i>Actinobacteria</i> (100%)                                   | <i>Acidimicrobiales</i> (60.5%)<br><i>Streptomyetales</i> (39.5%)                                   | <i>Acidimicrobiaceae</i> (60.5%)<br><i>Streptomyetaceae</i> (39.5%)                                    | NMDS2 (+)                                                                                  | Specialists heterotrophs and root endophytes ( <i>Streptomyces</i> )                       |
| <b>9 (small)</b> | <i>Actinobacteria</i> (52.3%)<br><i>Proteobacteria</i> (47.7%) | <i>Thermoleophilales</i> (52.3%)<br><i>Rhodobacterales</i> (47.7%)                                  | <i>Thermoleophilaceae</i> (52.3%)<br><i>Rhodobacteraceae</i> (47.7%)                                   | Invasion effect size diversity (+)                                                         | Generalist chemolithoautotrophs                                                            |

Percentages indicate the relative read abundance of the phylogenetic group within the cluster. Clusters are divided in large and small clusters based on their average relative read abundance (Fig 3). Putative generalist functions are based on relations to overall plant community parameters (productivity, diversity) or absence of a relation to the plant community. Putative specialist functions are based on relations with plant community composition, indicating that plant identity played a role. Putative fast growing characteristics were based on a high relative abundance of the cluster with high soil N, NO<sub>3</sub> or NH<sub>4</sub>, as well as the likely presence of readily available C sources (high belowground productivity). Putative slow growing characteristics were based on a low relative abundance of the cluster in these same soil conditions.

**Table S3** Dominant phyla, orders and families in soil prokaryote clusters of plant communities grown on abandoned arable soil

| Cluster           | Dominant phyla (>20%)                                                                          | Dominant orders (>10%)                                                                                                                                                                                     | Dominant families (>9%)                                                                                                                  | Relates to                                                                             | Putative metabolic traits and function                                                                                      |
|-------------------|------------------------------------------------------------------------------------------------|------------------------------------------------------------------------------------------------------------------------------------------------------------------------------------------------------------|------------------------------------------------------------------------------------------------------------------------------------------|----------------------------------------------------------------------------------------|-----------------------------------------------------------------------------------------------------------------------------|
| <b>1 (large)</b>  | <i>Proteobacteria</i> (50.4%)<br><i>Actinobacteria</i> (20.1%)                                 | <i>Spingomonadales</i> (18.2%)                                                                                                                                                                             | <i>Sphingomonadaceae</i> (16.8%)                                                                                                         | NMDS1 trajectory (-), invasion effect size composition (-)                             | Specialist metabolically diverse chemoheterotrophs. Many unknown                                                            |
| <b>2 (large)</b>  | <i>Proteobacteria</i> (54.2%)                                                                  | <i>Burkholderiales</i> (14.0%)<br><i>Chitinophagales</i> (13.1%)                                                                                                                                           | <i>Chitinophagaceae</i> (13.1%)                                                                                                          | pH (-), NO <sub>3</sub> (-), plant diversity (+)                                       | Generalist, slow growing chemoheterotrophs. Many unknown                                                                    |
| <b>3 (large)</b>  | <i>Proteobacteria</i> (28.5%)<br><i>Actinobacteria</i> (21.4%)                                 | <i>Nitrososphaerales</i> (13.6%)<br><i>Rhizobiales</i> (12.8%)<br><i>Cytophagales</i> (10.6%)                                                                                                              | <i>Nitrososphaeraceae</i> (13.6%)<br><i>Fulvivirgaceae</i> (10.4%)<br><i>Hyphomicrobiaceae</i> (9.9%)                                    | Total N (-), pH (+), invasion effect size NMDS2 (+)                                    | Specialist, slow growing. Ammonia oxidising archaea, chemolithoautotroph and likely also -heterotroph. Likely N-fixing taxa |
| <b>4 (small)</b>  | <i>Actinobacteria</i> (44.2%)<br><i>Acidobacteria</i> (25.7%)<br><i>Proteobacteria</i> (22.2%) | <i>Solirubrobacterales</i> (15.8%)<br><i>Xanthomonadales</i> (13.2%)<br><i>Gaiellales</i> (12.5%)                                                                                                          | <i>Solirubrobacteraceae</i> (15.8%)<br><i>Xanthomonadaceae</i> (13.2%)<br><i>Gaiellaceae</i> (12.5%)                                     | NMDS2 (-)                                                                              | Specialist chemoheterotrophs                                                                                                |
| <b>5 (small)</b>  | <i>Proteobacteria</i> (52.0%)<br><i>Actinobacteria</i> (22.2%)                                 | <i>Solirubrobacterales</i> (12.4%)<br><i>Sphingomonadales</i> (12.4%)<br><i>Rhizobiales</i> (11.1%)                                                                                                        | <i>Solirubrobacteraceae</i> (12.4%)<br><i>Sphingomonadaceae</i> (12.0%)<br><i>Chitinophagaceae</i> (9.0%)                                | Total N (+), organic C (-), NO <sub>2</sub> (+), aboveground productivity (+)          | Generalist, fast growing chemoheterotrophs                                                                                  |
| <b>6 (small)</b>  | <i>Proteobacteria</i> (60.5%)                                                                  | <i>Gemmatimonadales</i> (17.3%)<br><i>Myxococcales</i> (16.6%)<br><i>Burkholderiales</i> (14.0%)<br><i>Micropepsales</i> (12.8%)<br><i>Desulfuromonadales</i> (11.9%)<br><i>Chthoniobacterales</i> (11.0%) | <i>Gemmatimonadaceae</i> (17.3%)<br><i>Comamonadaceae</i> (14.0%)<br><i>Micropepsaceae</i> (12.8%)<br><i>Chthoniobacteraceae</i> (11.0%) | -                                                                                      | Generalist chemoheterotrophs, various likely N-fixing taxa                                                                  |
| <b>7 (small)</b>  | <i>Proteobacteria</i> (45.9%)<br><i>Acidobacteria</i> (27.4%)                                  | <i>Rhizobiales</i> (45.9%)<br><i>Verrucomicrobiales</i> (18.4%)                                                                                                                                            | <i>Methylocystaceae</i> (45.9%)<br><i>Verrucomicrobia subdivision 3</i> (18.4%)                                                          | Plant diversity (+)                                                                    | Generalist chemolithotrophs, aerobic methane oxidisers (more likely surviving on organic material) and N-fixing taxa        |
| <b>8 (small)</b>  | <i>Bacteroidetes</i> (63.6%)<br><i>Acidobacteria</i> (36.4%)                                   | <i>Chitinophagales</i> (63.6%)                                                                                                                                                                             | <i>Chitinophagaceae</i> (63.6%)                                                                                                          | Organic C (+), belowground productivity (-), plant diversity (-), NMDS3 trajectory (-) | Specialist, slow growing chemoheterotrophs                                                                                  |
| <b>9 (small)</b>  | <i>Acidobacteria</i> (76.8%)                                                                   | <i>Burkholderiales</i> (14.8%)                                                                                                                                                                             | <i>Alcaligenaceae</i> (14.8%)                                                                                                            | Plant diversity trajectory (+)                                                         | Unclear generalists, many unknown                                                                                           |
| <b>10 (small)</b> | <i>Actinobacteria</i> (68.0%)<br><i>Bacteroidetes</i> (32.0%)                                  | <i>Acidimicrobiales</i> (68.0%)<br><i>Chitinophagales</i> (32.0%)                                                                                                                                          | <i>Acidimicrobiaceae</i> (68.0%)<br><i>Chitinophagaceae</i> (32.0%)                                                                      | NH <sub>4</sub> (+), plant diversity (+), invasion effect size diversity (-)           | Generalist, fast growing chemoheterotrophs                                                                                  |

Percentages indicate the relative read abundance of the phylogenetic group within the cluster. Clusters are divided in large and small clusters based on their average relative read abundance (Fig 3). Putative generalist functions are based on relations to overall plant community parameters (productivity, diversity) or absence of a relation to the plant community. Putative specialist functions are based on relations with plant community composition, indicating that plant identity played a role. Putative fast growing characteristics were based on a high relative abundance of the cluster with high soil N, NO<sub>3</sub> or NH<sub>4</sub>, as well as the likely presence of readily available C sources (high belowground productivity). Putative slow growing characteristics were based on a low relative abundance of the cluster in these same soil conditions.

**Table S4** Dominant phyla, orders, families and putative traits in soil fungal clusters of plant communities grown on natural grassland soil

| Cluster          | Dominant phyla (>20%)                                         | Dominant orders (>9%)                                                                                                | Dominant families (>9%)                                                                                | Relates to                                                                                   | Dominant fungal traits (>9%)                         | Putative metabolic traits and functions                                                                                                                   |
|------------------|---------------------------------------------------------------|----------------------------------------------------------------------------------------------------------------------|--------------------------------------------------------------------------------------------------------|----------------------------------------------------------------------------------------------|------------------------------------------------------|-----------------------------------------------------------------------------------------------------------------------------------------------------------|
| <b>1 (small)</b> | <i>Ascomycota</i> (41.0%)<br><i>Mucoromycota</i> (37.5%)      | <i>Mucorales</i> (37.5%)<br><i>Archaeorhizomycetales</i> (15.7%)<br><i>Mortierellales</i> (15.0%)                    | <i>Mucoraceae</i> (37.5%)<br><i>Archaeorhizomycetaceae</i> (15.7%)<br><i>Mortierellaceae</i> (15.0%)   | Tot N (-), aboveground productivity (+)                                                      | Soil saprotroph (68.2%)                              | Generalist, slow growing soil saprotrophs                                                                                                                 |
| <b>2 (large)</b> | <i>Ascomycota</i> (89.0%)                                     | <i>Filobasidiales</i> (9.4%)                                                                                         | <i>Piskurozymaceae</i> (9.4%)                                                                          | Organic C (+), plant diversity trajectory (+)                                                | Soil saprotroph (9.4%)                               | Largely unknown <i>Ascomycota</i> . Likely generalist soil saprotrophs                                                                                    |
| <b>3 (large)</b> | <i>Mortierellomycota</i> (50.7%)<br><i>Ascomycota</i> (36.3%) | <i>Mortierellales</i> (50.7%)                                                                                        | <i>Mortierellaceae</i> (50.7%)                                                                         | Organic C (+), pH (+), belowground productivity (-)                                          | Soil saprotroph (52.7%)<br>Wood saprotroph (10.9%)   | Generalist, slow growing saprotrophs                                                                                                                      |
| <b>4 (large)</b> | <i>Ascomycota</i> (77.3%)<br><i>Basidiomycota</i> (22.7%)     | <i>Archaeorhizomycetales</i> (54.7%)<br><i>Agaricales</i> (21.9%)<br><i>Geoglossales</i> (18.1%)                     | <i>Archaeorhizomycetaceae</i> (54.6%)<br><i>Hygrophoraceae</i> (19.2%)<br><i>Geoglossaceae</i> (18.1%) | Organic C (-), NMDS2 (+), plant diversity trajectory (-), invasion effect size diversity (-) | Soil saprotroph (94.7%)                              | Specialist soil saprotrophs                                                                                                                               |
| <b>5 (large)</b> | <i>Ascomycota</i> (52.5%)<br><i>Mortierellomycota</i> (42.5%) | <i>Mortierellales</i> (42.5%)<br><i>Hypocreales</i> (35.8%)                                                          | <i>Mortierellaceae</i> (42.5%)<br><i>Nectriaceae</i> (33.4%)                                           | Organic C (+), invasion effect size diversity (+)                                            | Plant pathogen (36.5%)<br>Soil saprotroph (35.4%)    | Generalist soil saprotrophs and plant pathogens ( <i>Fusarium</i> , <i>Ilyonectria</i> , <i>Verticillium</i> , <i>Leptosphaeria</i> , <i>Gibberella</i> ) |
| <b>6 (large)</b> | <i>Ascomycota</i> (82.2%)                                     | <i>Helotiales</i> (57.5%)<br><i>Tremellales</i> (16.5%)<br><i>Capnodiales</i> (12.0%)<br><i>Thelebolales</i> (11.2%) | <i>Bulleribasidiaceae</i> (16.5%)<br><i>Cladosporiaceae</i> (12.0%)<br><i>Pseudeurotiaceae</i> (11.2%) | Belowground productivity (+), NMDS2 (-)                                                      | Soil saprotroph (27.9%)<br>Litter saprotroph (15.3%) | Specialist saprotrophs possibly profiting from rhizodeposits. Fast growing                                                                                |
| <b>7 (small)</b> | <i>Ascomycota</i> (86.4%)                                     | <i>Pezizales</i> (50.1%)<br><i>Mortierellales</i> (11.4%)                                                            | <i>Pyronemataceae</i> (46.3%)<br><i>Mortierellaceae</i> (11.4%)                                        | pH (+)                                                                                       | Soil saprotroph (13.6%)<br>Plant pathogen (9.2%)     | Generalist, soil saprotrophs and plant pathogens ( <i>Fusarium</i> , <i>Lectera</i> )                                                                     |
| <b>8 (small)</b> | <i>Ascomycota</i> (69.5%)<br><i>Basidiomycota</i> (23.7%)     | <i>Geoglossales</i> (56.0%)<br><i>Agaricales</i> (23.7%)                                                             | <i>Geoglossaceae</i> (56.0%)<br><i>Clavariaceae</i> (23.7%)                                            | Tot N (+), aboveground productivity (-), NMDS2 (+)                                           | Soil saprotroph (79.7%)                              | Specialist, fast growing soil saprotrophs                                                                                                                 |

Table S4 continued

| Cluster           | Dominant phyla (>20%)                                    | Dominant orders (>9%)                                         | Dominant families (>9%)                                                                        | Relates to                                         | Dominant fungal traits                                   | Putative function                                                                                                               |
|-------------------|----------------------------------------------------------|---------------------------------------------------------------|------------------------------------------------------------------------------------------------|----------------------------------------------------|----------------------------------------------------------|---------------------------------------------------------------------------------------------------------------------------------|
| <b>9 (small)</b>  | <i>Ascomycota</i> (84.8%)                                | <i>Archaeorhizomycetales</i> (42.3%)                          | <i>Archaeorhizomycetaceae</i> (42.3%)                                                          | NMDS1 (-), NMDS2 (+)                               | Soil saprotroph (51.2%)                                  | Specialist soil saprotrophs                                                                                                     |
| <b>10 (small)</b> | <i>Ascomycota</i> (55.8%)                                | <i>Pleosporales</i> (38.0%)<br><i>Agaricales</i> (13.5%)      | <i>Periconiaceae</i> (21.0%)<br><i>Hygrophoraceae</i> (13.0%)                                  | Tot P (-), pH (+), plant diversity trajectory (+)  | Soil saprotroph (22.4%)                                  | Generalist soil saprotrophs                                                                                                     |
| <b>11 (small)</b> | <i>Ascomycota</i> (64.1%)                                | <i>Pleosporales</i> (35.9%)<br><i>Helotiales</i> (14.3%)      | <i>Didymellaceae</i> (21.2%)<br><i>Sclerotiniaceae</i> (13.8%)<br><i>Pleosporaceae</i> (11.2%) | Invasion effect size<br>NMDS2 (-)                  | Plant pathogen (46.5%)                                   | Specialist plant pathogens ( <i>Phoma</i> , <i>Botrytis</i> , <i>Stemphylium</i> , <i>Ophiosphaerella</i> )                     |
| <b>12 (small)</b> | <i>Mucoromycota</i> (49.0%)<br><i>Ascomycota</i> (30.2%) | <i>Mucorales</i> (49.0%)<br><i>Pleosporales</i> (21.1%)       | <i>Mucoraceae</i> (49.0%)<br><i>Melanommataceae</i> (21.1%)                                    | NMDS3 (+)                                          | Soil saprotroph (50.4%)<br>Plant pathogen (21.1%)        | Specialist soil saprotrophs and plant pathogens ( <i>Herpotrichia</i> )                                                         |
| <b>13 (small)</b> | <i>Ascomycota</i> (81.0%)                                | <i>Pleosporales</i> (61.2%)                                   | <i>Phaeosphaeriaceae</i> (32.2%)<br><i>Pleosporales</i> (24.5%)                                | Aboveground productivity (-)                       | Plant pathogen (37.7%)                                   | Generalist plant pathogens ( <i>Paraphoma</i> , <i>Septoria</i> , <i>Plenodomus</i> )                                           |
| <b>14 (small)</b> | <i>Ascomycota</i> (82.3%)                                | <i>Pleosporales</i> (33.0%)<br><i>Geoglossales</i> (19.7%)    | <i>Didymellaceae</i> (25.6%)<br><i>Geoglossaceae</i> (19.7%)                                   | NH4 (+)                                            | Soil saprotroph (28.6%)<br>Plant pathogen (26.7%)        | Generalist soil saprotrophs and plant pathogens ( <i>Stagonosporopsis</i> , <i>Plectosphaerella</i> )                           |
| <b>15 (small)</b> | <i>Ascomycota</i> (79.9%)                                | <i>Chaetothyriales</i> (41.7%)<br><i>Pleosporales</i> (30.7%) | <i>Trichomeriaceae</i> (37.3%)<br><i>Didymellaceae</i> (25.8%)                                 | -                                                  | Unspecified saprotroph (37.3%)<br>Plant pathogen (36.3%) | Generalist saprotrophs and plant pathogens ( <i>Ascochyta</i> , <i>Gibberella</i> , <i>Coniosporium</i> )                       |
| <b>16 (small)</b> | <i>Ascomycota</i> (69.4%)                                | <i>Pleosporales</i> (44.0%)                                   | <i>Unidentified</i> (76.3%)                                                                    | Tot N (+), aboveground productivity trajectory (+) | Plant pathogen (11.1%)                                   | Generalist fast growing fungi. Possibly plant pathogens as order contains many putative plant pathogens, but also many unknown. |

Table S4 continued

| Cluster           | Dominant phyla (>20%)                                     | Dominant orders (>9%)                                                                                                     | Dominant families (>9%)                                                                           | Relates to                                                   | Dominant fungal traits                                                          | Putative function                                                                                               |
|-------------------|-----------------------------------------------------------|---------------------------------------------------------------------------------------------------------------------------|---------------------------------------------------------------------------------------------------|--------------------------------------------------------------|---------------------------------------------------------------------------------|-----------------------------------------------------------------------------------------------------------------|
| <b>17 (small)</b> | <i>Ascomycota</i> (72.1%)<br><i>Basidiomycota</i> (25.9%) | <i>Archaeorhizomycetales</i> (58.2%)<br><i>Trechisporales</i> (12.2%)                                                     | <i>Archaeorhizomycetaceae</i> (58.2%)                                                             | Belowground productivity (+), invasion effect size NMDS2 (+) | Soil saprotroph (62.7%)<br>Wood saprotroph (9.1%)                               | Specialist, fast growing saprotrophs possibly profiting from root exudates                                      |
| <b>18 (small)</b> | <i>Ascomycota</i> (32.3%)<br><i>Basidiomycota</i> (27.9%) | <i>Sebacinales</i> (18.5%)<br><i>Mortierallales</i> (14.1%)<br><i>Rhizophlyctidales</i> (9.9%)                            | <i>Sebacinaceae</i> (18.5%)<br><i>Mortierellaceae</i> (14.1%)<br><i>Rhizophlyctidaceae</i> (9.9%) | -                                                            | Litter saprotroph (22.8%)<br>Soil saprotroph (14.1%)                            | Generalist saprotrophs including litter                                                                         |
| <b>19 (small)</b> | <i>Ascomycota</i> (57.4%)<br><i>Basidiomycota</i> (38.0%) | <i>Hypocreales</i> (21.0%)<br><i>Agaricales</i> (15.1%)<br><i>Chaetothyriales</i> (13.7%)<br><i>Cantharellales</i> (9.8%) | <i>Ceratobasidiaceae</i> (9.8%)                                                                   | Plant diversity (+), NMDS2 (-), NMDS1 trajectory (-)         | Litter saprotroph (17.1%)<br>Animal parasite (11.0%)<br>Soil saprotroph (10.9%) | Specialist saprotrophs including litter. Possible nematode parasites                                            |
| <b>20 (small)</b> | <i>Kickxellomycota</i> (100%)                             | <i>Kickxellales</i> (100%)                                                                                                | <i>Kickxellaceae</i> (100%)                                                                       | NH <sub>4</sub> (-), aboveground productivity (-), NMDS3 (+) | Soil saprotroph (100%)                                                          | Specialist, slow growing soil saprotrophs                                                                       |
| <b>21 (small)</b> | <i>Ascomycota</i> (54.9%)                                 | <i>Pleosporales</i> (26.5%)<br><i>Verrucariales</i> (16.7%)<br><i>Orbiliiales</i> (11.4%)                                 | <i>Phaeosphaeriaceae</i> (26.5%)<br><i>Verrucariaceae</i> (16.7%)<br><i>Orbiliaceae</i> (11.4%)   | pH (-), invasion effect size composition (-)                 | Plant pathogen (26.5%)<br>Lichenized (16.7%)<br>Animal parasite (11.4%)         | Specialist lichens, nematode parasites ( <i>Arthrobotrys</i> ) and plant pathogens ( <i>Chaetosphaeronema</i> ) |

Percentages indicate the relative read abundance of the phylogenetic group within the cluster. Clusters are divided in large and small clusters based on their average relative read abundance (Fig 3). Putative generalist functions are based on relations to overall plant community parameters (productivity, diversity) or absence of a relation to the plant community. Putative specialist functions are based on relations with plant community composition, indicating that plant identity played a role. Putative fast growing characteristics were based on a high relative abundance of the cluster with high soil N, NO<sub>3</sub> or NH<sub>4</sub>, as well as the likely presence of readily available C sources (high belowground productivity). Putative slow growing characteristics were based on a low relative abundance of the cluster in these same soil conditions. Genera identified as putative plant pathogens presented in brackets.

**Table S5** Dominant phyla, orders, families and putative traits in soil fungal clusters of plant communities grown on abandoned arable soil

| Cluster           | Dominant phyla (>20%)                                         | Dominant orders (>9%)                                                                                                                                   | Dominant families (>9%)                                                                                                                                            | Relates to                                                            | Dominant fungal traits                                                                                                                            | Putative function                                                                                                                                                                                                                                                             |
|-------------------|---------------------------------------------------------------|---------------------------------------------------------------------------------------------------------------------------------------------------------|--------------------------------------------------------------------------------------------------------------------------------------------------------------------|-----------------------------------------------------------------------|---------------------------------------------------------------------------------------------------------------------------------------------------|-------------------------------------------------------------------------------------------------------------------------------------------------------------------------------------------------------------------------------------------------------------------------------|
| <b>1 (large)</b>  | <i>Mortierellomycota</i> (46.8%)<br><i>Ascomycota</i> (43.8%) | <i>Mortierellales</i> (46.8%)<br><i>Pezizales</i> (18.4%)                                                                                               | <i>Mortierellaceae</i> (46.8%)<br><i>Pyronemataceae</i> (16.2%)                                                                                                    | Tot C (-), pH (+), plant diversity (-), NMDS3 trajectory (+)          | Soil saprotroph (52.8%)                                                                                                                           | Specialist soil saprotrophs                                                                                                                                                                                                                                                   |
| <b>2 (large)</b>  | <i>Ascomycota</i> (61.3%)<br><i>Mortierellomycota</i> (34.8%) | <i>Mortierellales</i> (34.8%)<br><i>Hypocreales</i> (18.7%)                                                                                             | <i>Mortierellaceae</i> (34.8%)<br><i>Nectriaceae</i> (15.8%)                                                                                                       | Organic C (+), NO3 (+)                                                | Soil saprotroph (38.5%)<br>Plant pathogen (17.8%)                                                                                                 | Generalist, fast growing soil saprotrophs and plant pathogens ( <i>Fusarium</i> , <i>Ilyonectria</i> , <i>Nectria</i> , <i>Plenodomus</i> , <i>Thielaviopsis</i> , <i>Lectera</i> , <i>Paraphoma</i> , <i>Ascochyta</i> , <i>Plectosphaerella</i> , <i>Stagonosporopsis</i> ) |
| <b>3 (medium)</b> | <i>Ascomycota</i> (46.3%)<br><i>Basidiomycota</i> (42.3%)     | <i>Agaricales</i> (35.7%)<br><i>Geoglossales</i> (18.2%)<br><i>Archaeorhizomycetales</i> (12.2%)<br><i>Incertae</i> (9.8%)                              | <i>Clavariaceae</i> (33.0%)<br><i>Geoglossaceae</i> (18.2%)<br><i>Archaeorhizomycetaceae</i> (12.2%)                                                               | NO3 (-), NO2 (-), invasion effect size composition (+)                | Soil saprotroph (61.4%)                                                                                                                           | Specialist, slow growing soil saprotrophs                                                                                                                                                                                                                                     |
| <b>4 (small)</b>  | <i>Ascomycota</i> (62.4%)<br><i>Basidiomycota</i> (37.6%)     | <i>Agaricales</i> (37.6%)<br><i>Geoglossales</i> (20.5%)<br><i>Eurotiales</i> (14.2%)<br><i>Hypocreales</i> (12.0%)<br><i>Saccharomycetales</i> (11.6%) | <i>Tricholomataceae</i> (37.6%)<br><i>Geoglossaceae</i> (20.5%)<br><i>Aspergillaceae</i> (14.2%)<br><i>Nectriaceae</i> (12.0%)<br><i>Debaryomycetaceae</i> (11.6%) | NMDS2 trajectory (-), NMDS3 trajectory (+)                            | Litter saprotroph (37.6%)<br>Soil saprotroph (20.5%)<br>Plant pathogen (16.1%)<br>Unspecified saprotroph (14.2%)<br>Nectar/tap saprotroph (11.6%) | Specialist saprotrophs and plant pathogens ( <i>Fusarium</i> , <i>Protomyces</i> )                                                                                                                                                                                            |
| <b>5 (small)</b>  | <i>Ascomycota</i> (48.9%)<br><i>Mortierellomycota</i> (23.0%) | <i>Hypocreales</i> (34.1%)<br><i>Mortierellales</i> (23.0%)<br><i>Glomerales</i> (9.4%)                                                                 | <i>Mortierellaceae</i> (23.0%)<br><i>Hypocreaceae</i> (18.3%)<br><i>Nectriaceae</i> (15.8%)                                                                        | Belowground productivity (-), aboveground productivity trajectory (-) | Soil saprotroph (23.0%)<br>Mycoparasite (18.3%)                                                                                                   | Generalist, slow growing soil saprotrophs and mycoparasites                                                                                                                                                                                                                   |

**Table S5** Dominant phyla, orders, families and putative traits in soil fungal clusters of plant communities grown on abandoned arable soil

| Cluster           | Dominant phyla (>20%)                                     | Dominant orders (>9%)                                                                                                | Dominant families (>9%)                                                                                                       | Relates to                                | Dominant fungal traits                                                     | Putative function                                                                                                                                                                                                                                                                                                                              |
|-------------------|-----------------------------------------------------------|----------------------------------------------------------------------------------------------------------------------|-------------------------------------------------------------------------------------------------------------------------------|-------------------------------------------|----------------------------------------------------------------------------|------------------------------------------------------------------------------------------------------------------------------------------------------------------------------------------------------------------------------------------------------------------------------------------------------------------------------------------------|
| <b>6 (small)</b>  | <i>Ascomycota</i> (56.3%)<br><i>Basidiomycota</i> (21.3%) | <i>Agaricales</i> (17.4%)<br><i>Sordariales</i> (15.0%)<br><i>Pleosporales</i> (14.2%)<br><i>Orbiliiales</i> (12.4%) | <i>Agaricaceae</i> (17.1%)<br><i>Orbiliaceae</i> (12.4%)                                                                      | Tot N (+), tot P (-), plant diversity (+) | Soil saprotroph (29.8%)                                                    | Generalist, fast growing soil saprotrophs. Small proportion, but high diversity of plant pathogens ( <i>Herpotrichia</i> , <i>Chaetosphaeronema</i> , <i>Verticillium</i> , <i>Stemphylium</i> , <i>Periconia</i> , <i>Leptosphaeria</i> , <i>Fusarium</i> , <i>Alternaria</i> , <i>Gibellulopsis</i> , <i>Botrytis</i> , <i>Gibberella</i> ). |
| <b>7 (small)</b>  | <i>Ascomycota</i> (48.3%)<br><i>Basidiomycota</i> (36.5%) | <i>Sebacinales</i> (21.9%)<br><i>Pezizales</i> (19.5%)<br><i>Pleosporales</i> (12.7%)                                | <i>Sebacinaceae</i> (21.9%)<br><i>Pyronemataceae</i> (14.3%)                                                                  | Tot C (-), pH (+)                         | Soil saprotroph (25.5%)<br>Litter saprotroph (11.6%)                       | Generalist soil and litter saprotrophs                                                                                                                                                                                                                                                                                                         |
| <b>8 (small)</b>  | <i>Kickxellomycota</i> (57.4%)                            | <i>Kickxellales</i> (57.4%)<br><i>Mortierellales</i> (11.9%)                                                         | <i>Kickxellaceae</i> (57.4%)<br><i>Mortierellaceae</i> (11.9%)                                                                | Invasion effect size composition (-)      | Soil saprotroph (69.3%)                                                    | Specialist soil saprotrophs                                                                                                                                                                                                                                                                                                                    |
| <b>9 (small)</b>  | <i>Basidiomycota</i> (42.1%)<br><i>Ascomycota</i> (36.2%) | <i>Sebacinales</i> (29.1%)                                                                                           | <i>Serendipitaceae</i> (29.1%)                                                                                                | Belowground productivity (+)              | Root endophyte (29.1%)<br>Litter saprotroph (10.9%)                        | Generalist root endophytes ( <i>Serendipita</i> ) and litter saprotrophs                                                                                                                                                                                                                                                                       |
| <b>10 (small)</b> | <i>Ascomycota</i> (88.9%)                                 | <i>Pleosporales</i> (39.8%)<br><i>Geoglossales</i> (18.6%)<br><i>Pezizales</i> (9.2%)                                | <i>Didymellaceae</i> (24.1%)<br><i>Geoglossaceae</i> (18.6%)<br><i>Lentitheciaceae</i> (9.2%)<br><i>Pyronemataceae</i> (9.2%) | NMDS2 trajectory (-)                      | Soil saprotroph (28.1%)<br>Plant pathogen (24.1%)<br>Root endophyte (9.2%) | Specialist soil saprotrophs, plant pathogens ( <i>Ascochyta</i> ) and root endophytes ( <i>Darksidea</i> ).                                                                                                                                                                                                                                    |
| <b>11 (small)</b> | <i>Chytridiomycota</i> (100%)                             | <i>Rhizophydiales</i> (100%)                                                                                         | <i>Rhizophydiaceae</i> (100%)                                                                                                 | NMDS1 (-)                                 | Algal parasite (100%)                                                      | Specialist algal parasites                                                                                                                                                                                                                                                                                                                     |
| <b>12 (small)</b> | <i>Ascomycota</i> (51.2%)<br><i>Olpidiomycota</i> (36.3%) | <i>Olpidiales</i> (36.3%)                                                                                            | <i>Olpidiaceae</i> (36.3%)                                                                                                    | Tot P (-), pH (-)                         | Algal parasite (36.3%)<br>Litter saprotroph (10.8%)                        | Generalist litter saprotrophs and algal parasites                                                                                                                                                                                                                                                                                              |

Table S5 continued

| Cluster           | Dominant phyla (>20%)                                     | Dominant orders (>9%)                                                                                                                                          | Dominant families (>9%)                                                                                                         | Relates to                                                    | Dominant fungal traits                                                                                     | Putative function                                                                  |
|-------------------|-----------------------------------------------------------|----------------------------------------------------------------------------------------------------------------------------------------------------------------|---------------------------------------------------------------------------------------------------------------------------------|---------------------------------------------------------------|------------------------------------------------------------------------------------------------------------|------------------------------------------------------------------------------------|
| <b>13 (small)</b> | <i>Ascomycota</i> (43.4%)<br><i>Basidiomycota</i> (35.3%) | <i>Agaricales</i> (18.9%)<br><i>Mortierellales</i> (15.3%)<br><i>Cantharellales</i> (15.3%)<br><i>Pezizales</i> (14.8%)<br><i>Hypocreales</i> (10.4%)          | <i>Mortierellaceae</i> (15.3%)<br><i>Cantharellales</i> (15.3%)<br><i>Pyronemataceae</i> (14.8%)<br><i>Marasmiaceae</i> (12.8%) | Plant diversity trajectory (-), NMDS1 trajectory (+)          | Soil saprotroph (17.2%)<br>Litter saprotroph (17.1%)<br>Lichen parasite (15.3%)<br>Wood saprotroph (14.3%) | Specialist soil, litter and wood saprotrophs as well as lichen parasites.          |
| <b>14 (small)</b> | <i>Ascomycota</i> (50.4%)<br><i>Basidiomycota</i> (37.7%) | <i>Archaeorhizomycetales</i> (44.6%)<br><i>Agaricales</i> (37.7%)<br><i>Rhizophydiales</i> (10.9%)                                                             | <i>Archaeorhizomycetaceae</i> (44.6%)<br><i>Clavariaceae</i> (30.5%)                                                            | Organic C (-), NO3 (-)                                        | Soil saprotroph (82.3%)                                                                                    | Generalist, slow growing soil saprotrophs                                          |
| <b>15 (small)</b> | <i>Ascomycota</i> (74.9%)                                 | <i>Chaetothyriales</i> (19.9%)<br><i>Pleosporales</i> (16.5%)<br><i>Helotiales</i> (15.7%)<br><i>Orbiliiales</i> (10.8%)<br><i>Cystofilobasidiales</i> (10.3%) | <i>Sporormiaceae</i> (16.5%)<br><i>Orbiliaceae</i> (10.8%)<br><i>Mrakiaceae</i> (10.3%)                                         | NMDS1 (+), NMDS3 (-), aboveground productivity trajectory (-) | Dung saprotroph (16.5%)<br>Plant pathogen (10.3%)<br>Litter saprotroph (9.9%)                              | Specialist litter and dung saprotrophs and plant pathogens ( <i>Itersonilia</i> ). |
| <b>16 (small)</b> | <i>Basidiomycota</i> (100%)                               | Unidentified (100%)                                                                                                                                            | Unidentified (100%)                                                                                                             | Invasion effect size NMDS2 (+)                                | Unknown (100%)                                                                                             | Unknown specialists                                                                |
| <b>17 (small)</b> | <i>Ascomycota</i> (100%)                                  | <i>Melanosporales</i> (60.6%)                                                                                                                                  | <i>Melanosporaceae</i> (60.6%)                                                                                                  | pH (-), aboveground productivity (+)                          | Mycoparasite (60.6%)                                                                                       | Generalist mycoparasites                                                           |
| <b>18 (small)</b> | <i>Basidiomycota</i> (53.3%)<br><i>Ascomycota</i> (46.7%) | <i>Sebacinales</i> (53.3%)<br><i>Helotiales</i> (46.7%)                                                                                                        | <i>Serendipitaceae</i> (53.3%)                                                                                                  | -                                                             | Root endophyte (53.3%)                                                                                     | Generalist root endophytes ( <i>Serendipita</i> )                                  |

Percentages indicate the relative read abundance of the phylogenetic group within the cluster. Clusters are divided in large and small clusters based on their average relative read abundance (Fig 3). Putative generalist functions are based on relations to overall plant community parameters (productivity, diversity) or absence of a relation to the plant community. Putative specialist functions are based on relations with plant community composition, indicating that plant identity played a role. Putative fast growing characteristics were based on a high relative abundance of the cluster with high soil N, NO<sub>3</sub> or NH<sub>4</sub>, as well as the likely presence of readily available C sources (high belowground productivity). Putative slow growing characteristics were based on a low relative abundance of the cluster in these same soil conditions. Genera identified as putative plant pathogens presented in brackets.



**Table S6** Marginal R<sup>2</sup> of soil chemistry, microbial biomass pools and clusters from SEM models in natural grassland and abandoned arable plant communities

|                            | Natural grassland | Abandoned arable |                        | Natural grassland | Abandoned arable |
|----------------------------|-------------------|------------------|------------------------|-------------------|------------------|
| <b>Soil chemistry</b>      |                   |                  | <b>Fungal clusters</b> |                   |                  |
| Total N                    | 0.22              | 0.15             | 1                      | 0.51              | <b>0.56</b>      |
| Total P                    | 0.36              | 0.16             | 2                      | <b>0.49</b>       | <b>0.55</b>      |
| Total C                    | 0.00              | 0.17             | 3                      | <b>0.53</b>       | <b>0.59</b>      |
| Organic C                  | 0.24              | 0.24             | 4                      | <b>0.45</b>       | 0.34             |
| NO <sub>3</sub>            | 0.34              | 0.41             | 5                      | <b>0.62</b>       | 0.39             |
| NH <sub>4</sub>            | 0.21              | 0.20             | 6                      | <b>0.65</b>       | 0.46             |
| NO <sub>2</sub>            | 0.00              | 0.07             | 7                      | 0.34              | 0.38             |
| pH                         | 0.44              | 0.20             | 8                      | 0.43              | 0.29             |
| <b>PLFA/NLFA</b>           |                   |                  | 9                      | 0.71              | 0.31             |
| Bacterial biomass          | 0.65              | 0.55             | 10                     | 0.38              | 0.42             |
| Fungal biomass             | 0.42              | 0.69             | 11                     | 0.26              | 0.24             |
| AMF biomass                | 0.53              | 0.57             | 12                     | 0.23              | 0.47             |
| <b>Prokaryote clusters</b> |                   |                  | 13                     | 0.24              | 0.29             |
| 1                          | <b>0.29</b>       | <b>0.33</b>      | 14                     | 0.22              | 0.36             |
| 2                          | <b>0.51</b>       | <b>0.51</b>      | 15                     | 0.38              | 0.42             |
| 3                          | <b>0.46</b>       | <b>0.58</b>      | 16                     | 0.34              | 0.39             |
| 4                          | 0.53              | 0.27             | 17                     | 0.35              | 0.46             |
| 5                          | 0.33              | 0.64             | 18                     | 0.12              | 0.43             |
| 6                          | 0.60              | 0.27             | 19                     | 0.48              |                  |
| 7                          | 0.15              | 0.29             | 20                     | 0.57              |                  |
| 8                          | 0.16              | 0.45             | 21                     | 0.35              |                  |
| 9                          | 0.17              | 0.17             |                        |                   |                  |
| 10                         |                   | 0.58             |                        |                   |                  |

R<sup>2</sup> in bold belong to large clusters (Fig 3). Note: sowing density was incorporated as a random effect, but in most cases explained no variation. Marginal R<sup>2</sup> indicates variation explained by fixed factors only.

**Table S7** Summarised putative effects of the strongest pathways of the plant community in the year of sampling and past on microbial communities in natural grassland soil.

| Time point       | Plant parameter                              | Pathway    | Microbial biomass | Prokaryote clusters | Fungal clusters       | Putative metabolic traits and functions                                                                                                                                                                                                                       |
|------------------|----------------------------------------------|------------|-------------------|---------------------|-----------------------|---------------------------------------------------------------------------------------------------------------------------------------------------------------------------------------------------------------------------------------------------------------|
| Year of sampling | Plant diversity                              | direct     |                   | ↓7                  | ↑19                   | ↑ nitrifying taxa; generalist slow growing soil saprotrophs; specialist fast growing soil saprotrophs; generalist litter saprotrophs<br>↓ bacterial biomass; dominant fast growing chemoheterotrophs; generalist fast growing fungi (in part plant pathogens) |
|                  |                                              | via ↓N     |                   | ↓3                  | ↑1 ↑8<br>↓16          |                                                                                                                                                                                                                                                               |
|                  |                                              | via ↓P     | ↓bacteria         | ↑4                  | ↑10                   |                                                                                                                                                                                                                                                               |
|                  |                                              | via ↓NO3   |                   |                     |                       |                                                                                                                                                                                                                                                               |
| Year of sampling | Belowground productivity                     | direct     | ↑ bacteria        | ↑1 ↓4 ↓5            | ↓3 ↑6<br>↑17          | ↑ bacterial biomass; dominant fast chemoheterotrophs; dominant and other fast specialist soil saprotrophs; litter and wood saprotrophs<br>↓ nitrifying taxa; slow chemolithoautotrophs and heterotrophs; dominant slow generalist soil and wood saprotrophs   |
| Year of sampling | Composition (NMDS2) – residence time         | direct     |                   | ↑8                  | ↑4 ↓6<br>↑8 ↑9<br>↓19 | ↑ root endophytes; dominant specialist soil saprotrophs; specialist fast growing soil saprotrophs<br>↓ dominant fast and other specialist soil and litter saprotrophs                                                                                         |
| Year of sampling | Composition (NMDS3) – differential dominance | direct     |                   |                     | ↑12<br>↑20            | ↑ specialist soil saprotrophs and plant pathogens                                                                                                                                                                                                             |
| Past             | AP trajectory                                | direct     |                   |                     | ↑16                   | ↑ bacterial biomass; generalist fast growing fungi (in part plant pathogens); specialist lichens, nematode parasites and plant pathogens<br>↓ nitrifying taxa; dominant and other generalist soil and wood saprotrophs; generalist plant pathogens            |
|                  |                                              | via ↑P     | ↑bacteria         | ↓4                  | ↓10                   |                                                                                                                                                                                                                                                               |
|                  |                                              | via ↓pH    |                   |                     | ↓3 ↓7<br>↓10<br>↑21   |                                                                                                                                                                                                                                                               |
| Past             | Plant diversity trajectory                   | direct     | ↓AMF              | ↓2 ↑3               | ↑2 ↓4<br>↑10          | ↑ dominant fast-growing chemoheterotrophs; dominant and other generalist soil saprotrophs<br>↓ AMF biomass; dominant chemoheterotrophs; N-fixing taxa; dominant specialist soil saprotrophs                                                                   |
| Past             | Invasion effect size diversity               | direct     |                   | ↑5 ↑6 ↑9            | ↓4 ↑5                 | ↑ AMF biomass, chemolithoautotrophs; dominant generalist and other soil saprotrophs and plant pathogens<br>↓ dominant generalist soil saprotrophs; specialist lichens, nematode parasites and plant pathogens                                                 |
|                  |                                              | via ↓org C | ↑AMF              | ↓5 ↓6               | ↓2 ↓3<br>↑4 ↑5        |                                                                                                                                                                                                                                                               |
|                  |                                              | via ↑pH    |                   |                     | ↑3 ↑7<br>↑10<br>↓21   |                                                                                                                                                                                                                                                               |

In bold: dominant clusters. See Fig 5 for overview of pathways strengths.

**Table S7** continued

| Time point | Plant parameter                  | Pathway  | Microbial biomass   | Prokaryote clusters | Fungal clusters         | Putative metabolic traits and functions                                                                                                                                                                                                                                                                                                                   |
|------------|----------------------------------|----------|---------------------|---------------------|-------------------------|-----------------------------------------------------------------------------------------------------------------------------------------------------------------------------------------------------------------------------------------------------------------------------------------------------------------------------------------------------------|
| Past       | NMDS2 trajectory                 | direct   | ↓fungi              | <b>↓2 ↑3</b>        | ↑19                     | ↑ dominant fast-growing chemoheterotrophs; dominant and other generalist soil and wood saprotrophs; specialist soil and litter saprotrophs; generalist plant pathogens<br>↓ fungal and AMF biomass; dominant chemoheterotrophs; N-fixing taxa; generalist soil saprotrophs and plant pathogens; specialist lichens, nematode parasite and plant pathogens |
|            |                                  | via ↑pH  |                     |                     | <b>↑3</b> ↑7<br>↑10 ↓21 |                                                                                                                                                                                                                                                                                                                                                           |
|            |                                  | via ↓NH4 | ↓fungi<br>↓AMF      |                     | ↓14 ↑20                 |                                                                                                                                                                                                                                                                                                                                                           |
| Past       | NMDS3 trajectory                 | direct   | ↑bacteria<br>↑fungi |                     |                         | ↑ bacterial and fungal biomass; specialist lichens, nematode parasites and plant pathogens<br>↓ dominant and other generalist soil and wood saprotrophs; generalist plant pathogens                                                                                                                                                                       |
|            |                                  | via ↓pH  |                     |                     | <b>↓3</b> ↓7<br>↓10 ↑21 |                                                                                                                                                                                                                                                                                                                                                           |
| Past       | Invasion effect size composition | direct   |                     |                     | ↓11 ↑17<br>↓21          | ↑ specialist soil and wood saprotrophs<br>↓ specialist plant pathogens, lichens and nematode parasites                                                                                                                                                                                                                                                    |

In bold: dominant clusters. See Fig 5 for overview of pathways strengths.

**Table S8** Summarised putative effects of the strongest pathways of the plant community in the year of sampling and past on microbial communities in abandoned arable soil.

| Time point       | Plant parameter                              | Pathway  | Microbial biomass           | Prokaryote clusters    | Fungal clusters         | Putative metabolic traits and functions                                                                                                                                                                                                                                                                                                                                       |
|------------------|----------------------------------------------|----------|-----------------------------|------------------------|-------------------------|-------------------------------------------------------------------------------------------------------------------------------------------------------------------------------------------------------------------------------------------------------------------------------------------------------------------------------------------------------------------------------|
| Year of sampling | Plant diversity                              | direct   | ↓bacteria<br>↓fungi<br>↓AMF | <b>↑2</b> ↑7 ↓8<br>↑10 | ↓ <b>1</b> ↑6           | ↑ dominant slow growing chemoheterotrophs; aerobic methane oxidisers and N-fixing taxa; generalist fast growing soil saprotrophs and plant pathogens<br>↓ bacterial, fungal and AMF biomass; slow growing chemoheterotrophs; dominant specialist soil saprotrophs                                                                                                             |
| Year of sampling | Belowground productivity                     | direct   |                             | ↓8                     | ↓5 ↑9                   | ↑ root endophytes and litter saprotrophs<br>↓ chemoheterotrophs (dead material); generalist soil saprotrophs and mycoparasites                                                                                                                                                                                                                                                |
| Year of sampling | Composition (NMDS2) – residence time         | direct   |                             | ↓4                     |                         | ↓ Specialist chemoheterotrophs                                                                                                                                                                                                                                                                                                                                                |
| Year of sampling | Composition (NMDS3) – differential dominance | direct   | ↓AMF                        |                        | ↓15                     | ↑ dominant slow AOA and N-fixing taxa; dominant specialist soil saprotrophs; dominant generalist fast-growing soil saprotrophs and plant pathogens; generalist mycoparasites<br>↓ fungal and AMF biomass; dominant slow growing chemoheterotrophs; generalist litter saprotrophs; generalist slow growing soil saprotrophs; specialist litter saprotrophs and plant pathogens |
|                  |                                              | via ↑NO3 | ↓fungi<br>↓AMF              | <b>↓2</b>              | <b>↑2</b> ↓3<br>↓14     |                                                                                                                                                                                                                                                                                                                                                                               |
|                  |                                              | via ↑pH  |                             | <b>↓2</b> ↑3           | <b>↑1</b> ↑7<br>↓12 ↑17 |                                                                                                                                                                                                                                                                                                                                                                               |
| Past             | AP trajectory                                | direct   |                             |                        | ↓5 ↓15                  | ↓ generalist soil saprotrophs and mycoparasites; specialist litter saprotrophs and plant pathogens                                                                                                                                                                                                                                                                            |
| Past             | Plant diversity trajectory                   | direct   |                             | ↑9                     | ↓13                     | ↑ fast-growing chemoheterotrophs; generalist fast-growing soil saprotrophs and plant pathogens<br>↓ bacterial biomass; dominant AOA and N-fixing taxa; specialist soil, litter and wood saprotrophs                                                                                                                                                                           |
|                  |                                              | via ↑N   | ↓bacteria                   | <b>↓3</b> ↑5           | ↑6                      |                                                                                                                                                                                                                                                                                                                                                                               |
| Past             | Invasion effect size plant diversity         | direct   |                             | ↓10                    |                         | ↑ fast-growing chemoheterotrophs; dominant specialist slow-growing soil saprotrophs<br>↓ bacterial biomass; chemoheterotrophs                                                                                                                                                                                                                                                 |
|                  |                                              | via ↓NO2 | ↓bacteria                   | ↑5                     | <b>↑3</b>               |                                                                                                                                                                                                                                                                                                                                                                               |

In bold: dominant clusters. See Fig 5 for overview of pathways strengths.

**Table S8** Summarised putative effects of the most important plant community parameters in the year of sampling and past effects on microbial soil legacies in abandoned arable soil communities

| Time point | Plant parameter                          | Pathway   | Microbial biomass | Prokaryote clusters | Fungal clusters | Putative function                                                                                                                                                                                                                                                                                                                                                                                                            |
|------------|------------------------------------------|-----------|-------------------|---------------------|-----------------|------------------------------------------------------------------------------------------------------------------------------------------------------------------------------------------------------------------------------------------------------------------------------------------------------------------------------------------------------------------------------------------------------------------------------|
| Past       | NMDS1 trajectory                         | direct    |                   | ↓1                  | ↑13             | ↑ specialist soil, litter and wood saprotrophs<br>↓ dominant chemoheterotrophs                                                                                                                                                                                                                                                                                                                                               |
| Past       | NMDS2 trajectory                         | direct    |                   |                     | ↓4 ↓10          | ↓ specialist soil saprotrophs, plant pathogens and root endophytes                                                                                                                                                                                                                                                                                                                                                           |
| Past       | NMDS3 trajectory                         | direct    | ↓fungi            | ↓8                  | ↑1 ↑4           | ↑ dominant and other specialist soil saprotrophs; specialist plant pathogens; generalist fast-growing soil saprotrophs and plant pathogens; generalist litter saprotrophs<br>↓ fungal biomass; chemoheterotrophs (dead material)                                                                                                                                                                                             |
|            |                                          | via ↓P    |                   |                     | ↑6 ↑12          |                                                                                                                                                                                                                                                                                                                                                                                                                              |
| Past       | Invasion effect size composition (NMDS2) | direct    |                   | ↓1 ↑3               | ↑3 ↓8<br>↑16    | ↑ dominant AOA and N-fixing taxa; fast-growing chemoheterotrophs; dominant specialist soil saprotrophs; dominant slow-growing soil saprotrophs; generalist soil and litter saprotrophs; generalist slow-growing soil saprotrophs; unknown specialists<br>↓ dominant chemoheterotrophs; chemoheterotrophs (dead material); dominant generalist fast-growing soil saprotrophs and plant pathogens; specialist soil saprotrophs |
|            |                                          | via ↓C    |                   |                     | ↑1 ↑7           |                                                                                                                                                                                                                                                                                                                                                                                                                              |
|            |                                          | via ↓orgC |                   | ↑5 ↓8               | ↓2 ↑14          |                                                                                                                                                                                                                                                                                                                                                                                                                              |

In bold: dominant clusters. See Fig 5 for overview of pathways strengths.

**Table S9** Sown and invaded plant species and their abbreviations

| <b>Plant species</b>             | <b>Abbreviation</b> | <b>Sown/invaded</b>   |
|----------------------------------|---------------------|-----------------------|
| <i>Acer spp</i>                  | Acesp               | Invaded               |
| <i>Agrimonia eupatorium</i>      | Agreu               | Sown                  |
| <i>Agrostis spp</i>              | Agrsp               | Invaded               |
| <i>Anthericum ramosum</i>        | Antra               | Sown, not established |
| <i>Anthylis vulneraria</i>       | Antvu               | Sown                  |
| <i>Arabidopsis thaliana</i>      | Arath               | Invaded               |
| <i>Arenaria serpyllifolia</i>    | Arese               | Invaded               |
| <i>Arrhenatherum elatior</i>     | Arrel               | Invaded               |
| <i>Artemisia vulgaris</i>        | Artvu               | Invaded               |
| <i>Asperula spp</i>              | Aspsp               | Sown                  |
| <i>Aster amellus</i>             | Astam               | Sown, not established |
| <i>Astragalus cicer</i>          | Astci               | Sown                  |
| <i>Astragalus glycyphylus</i>    | Astgl               | Sown                  |
| <i>Atriplex spp</i>              | Atrsp               | Invaded               |
| <i>Brachypodium pinnatum</i>     | Brapi               | Sown                  |
| <i>Bromus erectus</i>            | Broer               | Sown                  |
| <i>Bromus mollis</i>             | Bromo               | Invaded               |
| <i>Bupleurum falcatum</i>        | Bupfa               | Sown                  |
| <i>Calamagrostis epigejos</i>    | Calep               | Invaded               |
| <i>Campanula gentilis</i>        | Camge               | Sown                  |
| <i>Campanula glomerata</i>       | Camgl               | Sown                  |
| <i>Campanula patula</i>          | Campa               | Invaded               |
| <i>Carex flacca</i>              | Carfl               | Sown                  |
| <i>Carex hirta</i>               | Carhi               | Invaded               |
| <i>Cardamine spp</i>             | Carsp               | Invaded               |
| <i>Carex tomentosa</i>           | Carto               | Sown                  |
| <i>Centaurea jacea</i>           | Cenja               | Sown                  |
| <i>Centaurea scabiosa</i>        | Censc               | Sown                  |
| <i>Cerastium holosteoides</i>    | Cerho               | Invaded               |
| <i>Cirsium acaule</i>            | Cirac               | Sown, not established |
| <i>Cirsium pannonicum</i>        | Cirpa               | Sown                  |
| <i>Conyza spp</i>                | Consp               | Invaded               |
| <i>Coronilla varia</i>           | Corva               | Sown, not established |
| <i>Crepis biennis</i>            | Crebi               | Invaded               |
| <i>Dactylis glomerata</i>        | Dacgl               | Invaded               |
| <i>Daucus carota</i>             | Dauca               | Invaded               |
| <i>Dianthus carthusianorum</i>   | Diaca               | Sown, not established |
| <i>Dipsacus sylvestris</i>       | Dipsy               | Invaded               |
| <i>Elymus repens</i>             | Elyre               | Invaded               |
| <i>Epilobium spp</i>             | Episp               | Invaded               |
| <i>Erigeron annuus</i>           | Erian               | Invaded               |
| <i>Euphorbia cyparissias</i>     | Eupcy               | Invaded               |
| <i>Fallopia convolvulus</i>      | Falco               | Invaded               |
| <i>Falcaria vulgaris</i>         | Falvu               | Invaded               |
| <i>Galeopsis spp</i>             | Galsp               | Invaded               |
| <i>Geranium sibiricum</i>        | Gersi               | Invaded               |
| <i>Helianthemum grandiflorum</i> | Helgr               | Sown                  |
| <i>Heracleum mantegazzianum</i>  | Herma               | Invaded               |
| <i>Hieracium spp</i>             | Hiesp               | Invaded               |
| <i>Holcus mollis</i>             | Holmo               | Invaded               |
| <i>Hypericum perforatum</i>      | Hyppe               | Invaded               |
| <i>Inula hirta</i>               | Inuhi               | Sown                  |
| <i>Inula salicina</i>            | Inusa               | Sown                  |

**Table S9** Continued

| <b>Plant species</b>          | <b>Abbreviation</b> | <b>Sown/invaded</b>   |
|-------------------------------|---------------------|-----------------------|
| <i>Lactuca serriola</i>       | Lacse               | Invaded               |
| <i>Lamium purpureum</i>       | Lampu               | Invaded               |
| <i>Laserpitium latifolium</i> | Lasla               | Sown                  |
| <i>Lathyrus pratensis</i>     | Latpr               | Invaded               |
| <i>Leontodon autumnalis</i>   | Leoau               | Invaded               |
| <i>Leontodon hispidus</i>     | Leohi               | Sown                  |
| <i>Linum catharticum</i>      | Linca               | Invaded               |
| <i>Linum flavum</i>           | Linfl               | Sown                  |
| <i>Linum tenuifolium</i>      | Linte               | Sown                  |
| <i>Lolium perenne</i>         | Lolpe               | Invaded               |
| <i>Lotus corniculatus</i>     | Lotco               | Sown                  |
| <i>Medicago falcata</i>       | Medfa               | Sown                  |
| <i>Medicago lupulina</i>      | Medlu               | Invaded               |
| <i>Myos spp</i>               | Myosp               | Invaded               |
| <i>Plantago lanceolata</i>    | Plala               | Invaded               |
| <i>Plantago media</i>         | Plame               | Sown                  |
| <i>Poa annua</i>              | Poaaan              | Invaded               |
| <i>Poa trivialis</i>          | Poatr               | Invaded               |
| <i>Polygonum spp</i>          | Polsp               | Invaded               |
| <i>Primula veris</i>          | Prive               | Sown, not established |
| <i>Prunella grandiflora</i>   | Prugr               | Sown                  |
| <i>Ranunculus spp</i>         | Ransp               | Invaded               |
| <i>Raphanus raphanistrum</i>  | Rapra               | Invaded               |
| <i>Rumex spp</i>              | Rumsp               | Invaded               |
| <i>Salvia pratensis</i>       | Salpr               | Sown                  |
| <i>Salix spp</i>              | Salsp               | Invaded               |
| <i>Salvia verticilata</i>     | Salve               | Sown                  |
| <i>Sanquisorba minor</i>      | Sanmi               | Sown                  |
| <i>Scabiosa ochroleuca</i>    | Scaoc               | Sown                  |
| <i>Silene vulgaris</i>        | Silvu               | Invaded               |
| <i>Solidago canadensis</i>    | Solca               | Invaded               |
| <i>Sonchus spp</i>            | Sonsp               | Invaded               |
| <i>Stachys recta</i>          | Stare               | Sown                  |
| <i>Stipa spp</i>              | Stisp               | Invaded               |
| <i>Tanacetum corymbosum</i>   | Tanco               | Sown                  |
| <i>Tanacetum spp</i>          | Tansp               | Invaded               |
| <i>Tanacetum vulgare</i>      | Tanvu               | Invaded               |
| <i>Taraxacum officinalis</i>  | Tarof               | Invaded               |
| <i>Teucrium chamaedrys</i>    | Teuch               | Sown                  |
| <i>Thlaspi arvense</i>        | Thlar               | Invaded               |
| <i>Thymus pulegioides</i>     | Thyvu               | Sown                  |
| <i>Trifolium medium</i>       | Trime               | Sown                  |
| <i>Trifolium montanum</i>     | Trimo               | Sown                  |
| <i>Trifolium pratensis</i>    | Tripr               | Invaded               |
| <i>Trifolium repens</i>       | Trire               | Invaded               |
| <i>Tussilago farfara</i>      | Tusfa               | Invaded               |
| <i>Urtica dioica</i>          | Urtdi               | Invaded               |
| <i>Veronica teucrium</i>      | Verteu              | Sown                  |
| <i>Vicia spp</i>              | Vicsp               | Invaded               |
